# Supplementary material for: Salt-promoted catalytic methanol carbonylation using iridium pincer-crown ether complexes
Source: Royal Society of Chemistry journal article supplement (doi:10.1039/c8cy00328a), 2018-01-01
Supplement: c8cy00328a1.pdf [file c8cy00328a1.pdf]

**Supporting Information  
for**

**Salt-Promoted Catalytic Methanol Carbonylation Using Iridium Pincer-Crown Ether  
Complexes**

*Lauren C. Gregor,<sup>‡</sup> Javier Grajeda,<sup>‡</sup> Peter S. White,<sup>‡</sup> Andrew J. Vetter,<sup>§</sup> and Alexander J. M.  
Miller<sup>‡\*</sup>*

*<sup>‡</sup> Department of Chemistry, University of North Carolina at Chapel Hill, Chapel Hill, North  
Carolina 27599-3290, United States*

*<sup>§</sup> Eastman Chemical Company, Kingsport, Tennessee 37660, United States*

[ajmm@email.unc.edu](mailto:ajmm@email.unc.edu)

**Table of Contents**

|                                                                             |     |
|-----------------------------------------------------------------------------|-----|
| I. NMR Spectra of New Compounds                                             | S2  |
| II. Multireactor Catalysis Data                                             | S14 |
| III. NMR Studies: Catalyst Speciation and Turnover Under Various Conditions | S22 |
| IV. Crystallographic Details                                                | S33 |

## I. NMR Spectra of New Compounds

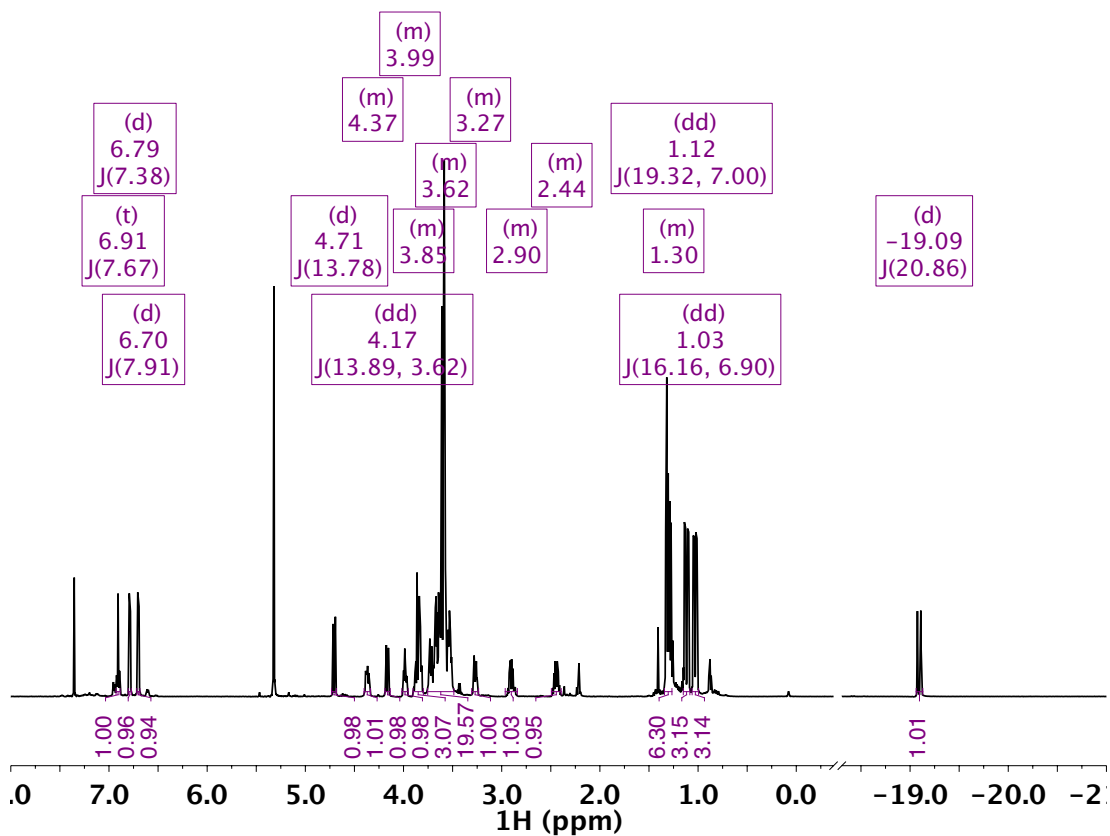

Figure S1.  $^1\text{H}$  NMR spectrum of  $\kappa^3\text{-}(^{18}\text{c}6)\text{NCOP}^{\text{iPr}}\text{Ir}(\text{H})(\text{CO})(\text{Cl})$  ( $\mathbf{1}^{18\text{c}6}$ ) in  $\text{CD}_2\text{Cl}_2$ .

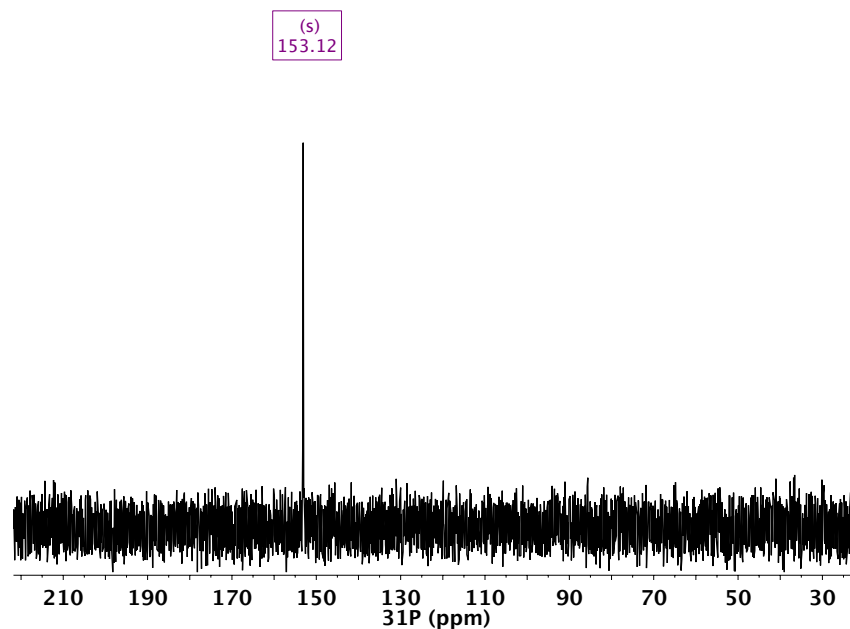

Figure S2.  $^{31}\text{P}\{^1\text{H}\}$  NMR spectrum of  $\kappa^3\text{-}(^{18}\text{c}6)\text{NCOP}^{\text{iPr}}\text{Ir}(\text{H})(\text{CO})(\text{Cl})$  ( $\mathbf{1}^{18\text{c}6}$ ) in  $\text{CD}_2\text{Cl}_2$ .

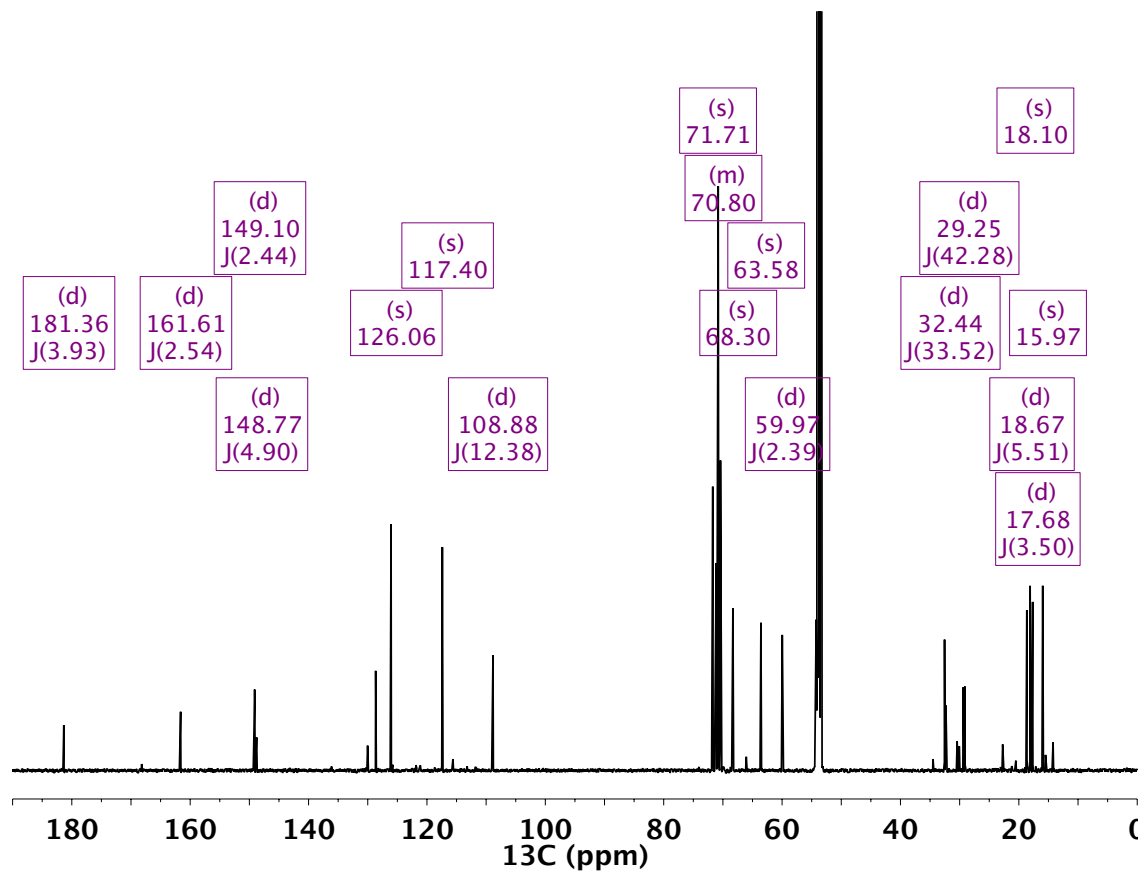

**Figure S3.**  $^{13}\text{C}\{^1\text{H}\}$  NMR spectrum of  $\kappa^3\text{-}(^{18}\text{c}6)\text{NCOP}^{\text{iPr}}\text{Ir}(\text{H})(\text{CO})(\text{Cl})$  ( $\mathbf{1}^{18\text{c}6}$ ) in  $\text{CD}_2\text{Cl}_2$ .

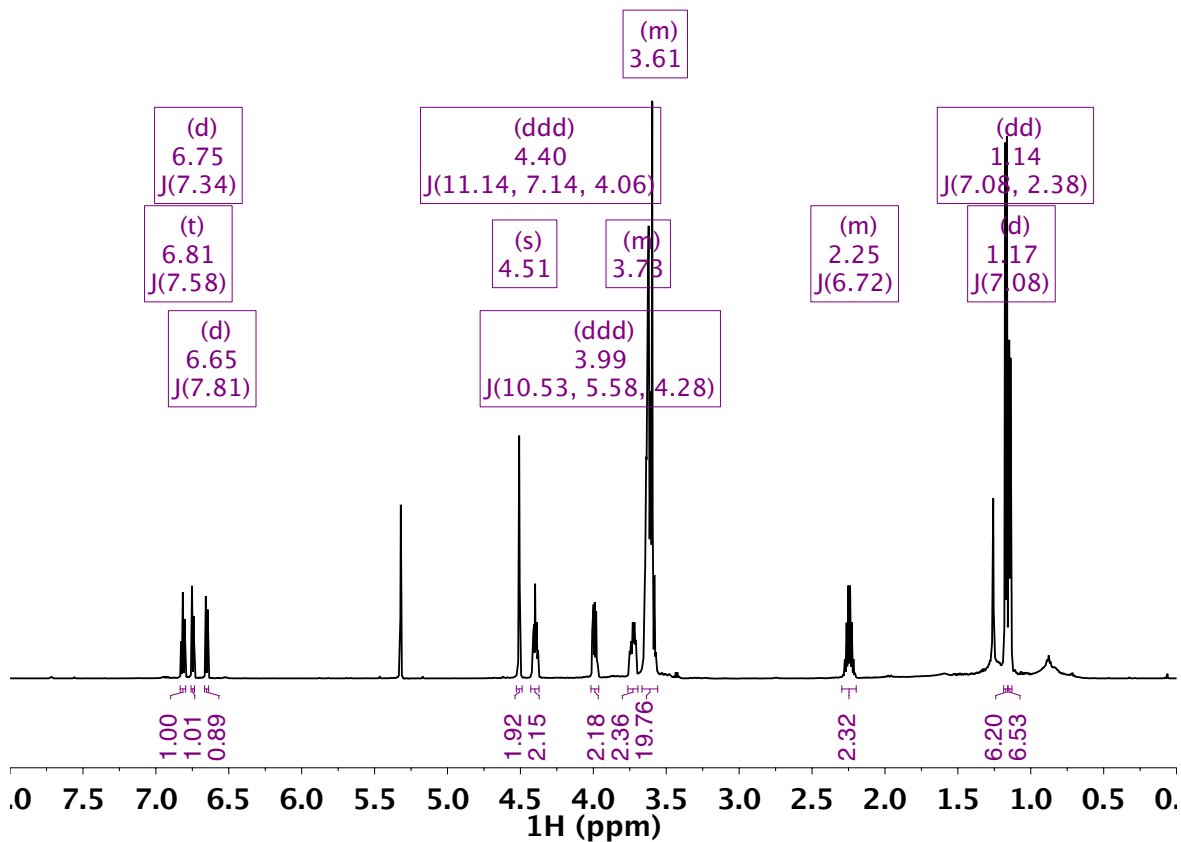

Figure S4.  $^1\text{H}$  NMR spectrum of  $\kappa^3\text{-(}^{18}\text{c}6\text{)NCOP}^{\text{iPr}}\text{Ir(CO) (2}^{18}\text{c}6\text{)}$  in  $\text{CD}_2\text{Cl}_2$ .

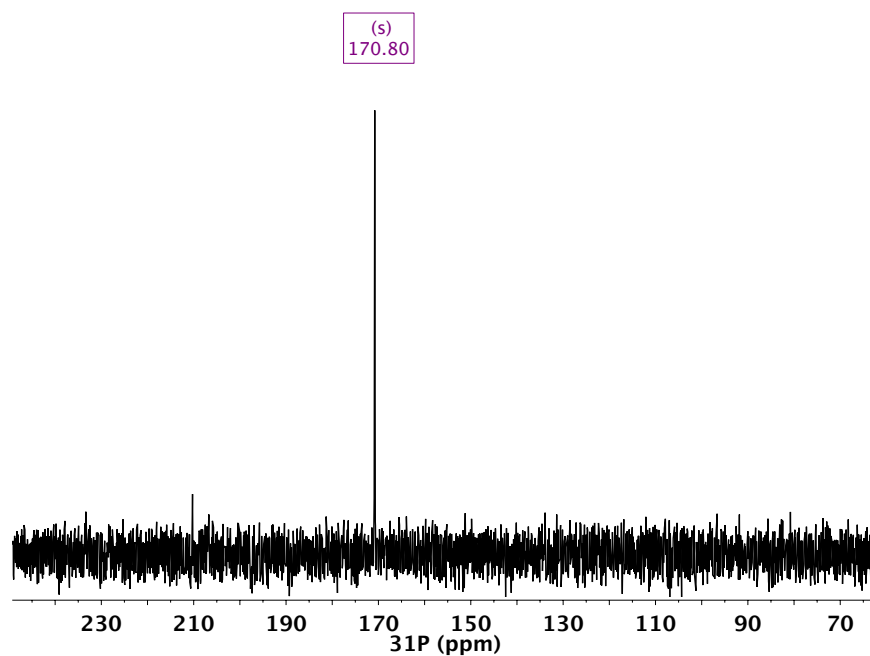

Figure S5.  $^{31}\text{P}\{^1\text{H}\}$  NMR spectrum of  $\kappa^3\text{-(}^{18}\text{c}6\text{)NCOP}^{\text{iPr}}\text{Ir(CO) (2}^{18}\text{c}6\text{)}$  in  $\text{CD}_2\text{Cl}_2$ .

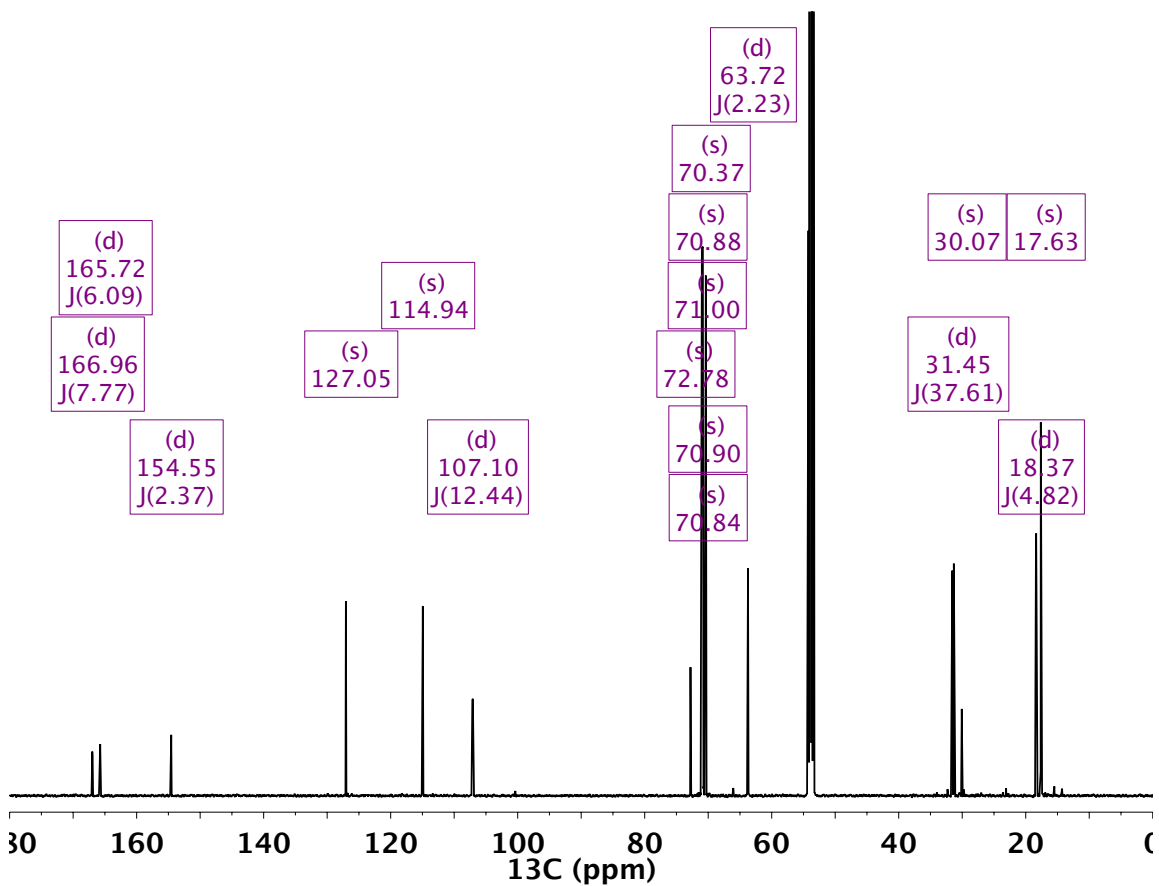

**Figure S6.**  $^{13}\text{C}\{^1\text{H}\}$  NMR spectrum of  $\kappa^3\text{-}(^{18}\text{c}6)\text{NCOP}^{\text{iPr}}\text{Ir}(\text{CO})$  ( $2^{18\text{c}6}$ ) in  $\text{CD}_2\text{Cl}_2$ .

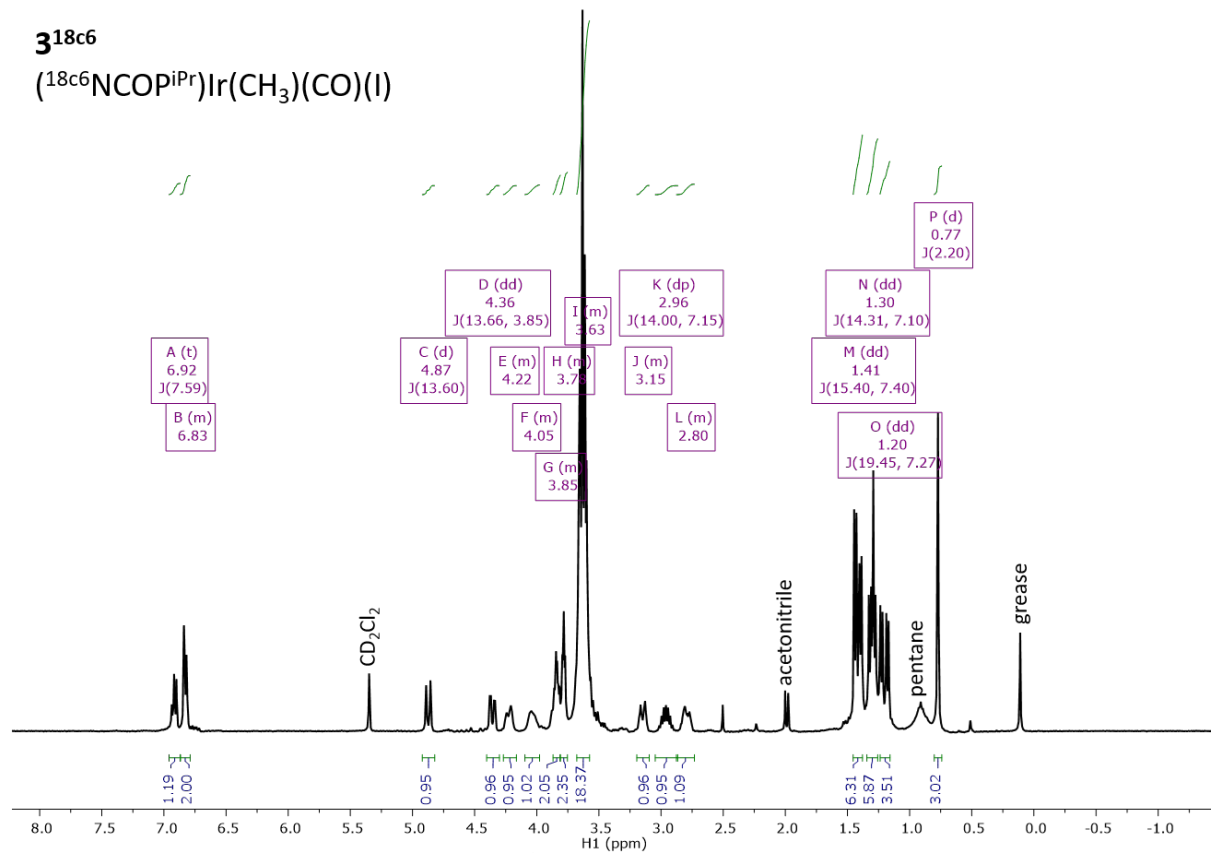

**Figure S7.**  $^1\text{H}$  NMR spectrum of  $(^{18}\text{C}_6\text{NCOP}^{\text{iPr}})\text{Ir}(\text{CH}_3)(\text{CO})(\text{I})$  (**3<sup>18c6</sup>**) in  $\text{CD}_2\text{Cl}_2$ .

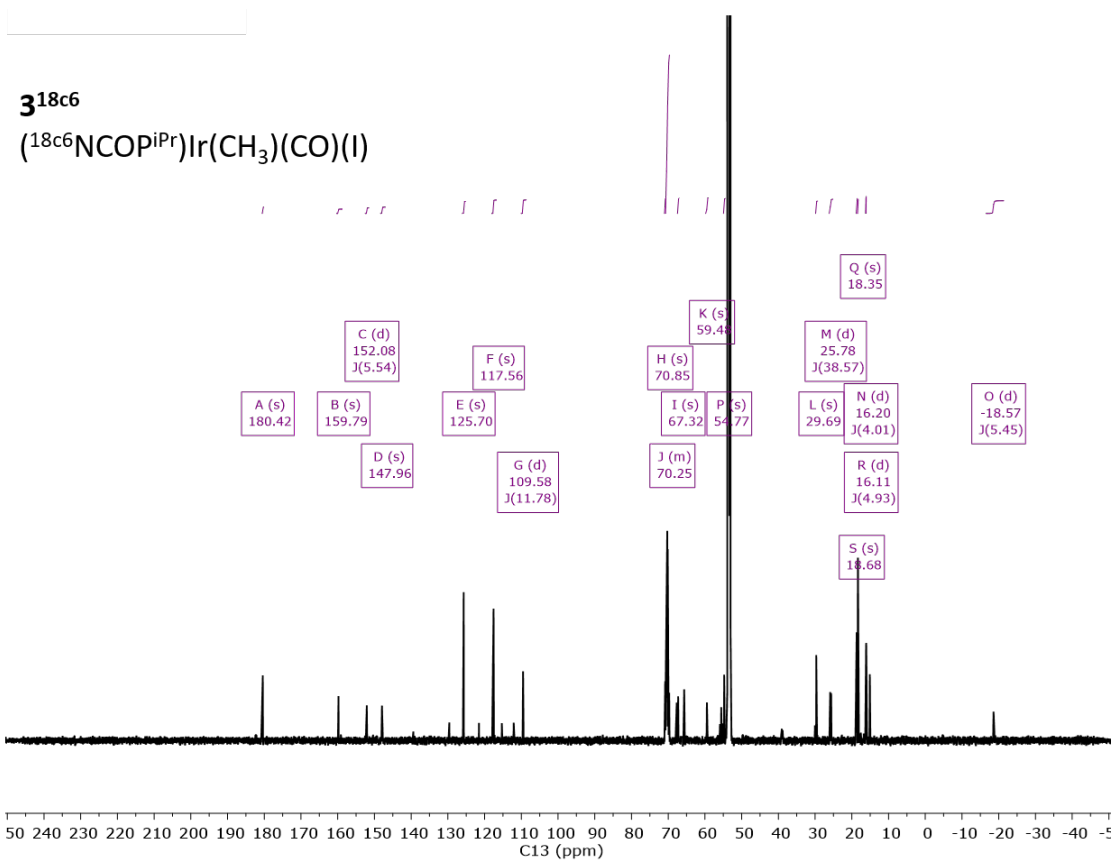

**Figure S8.**  $^{13}\text{C}\{^1\text{H}\}$  NMR spectrum of  $(^{18}\text{C}6\text{NCOPiPr})\text{Ir}(\text{CH}_3)(\text{CO})(\text{I})$  (**3<sup>18c6</sup>**) in  $\text{CD}_2\text{Cl}_2$ .

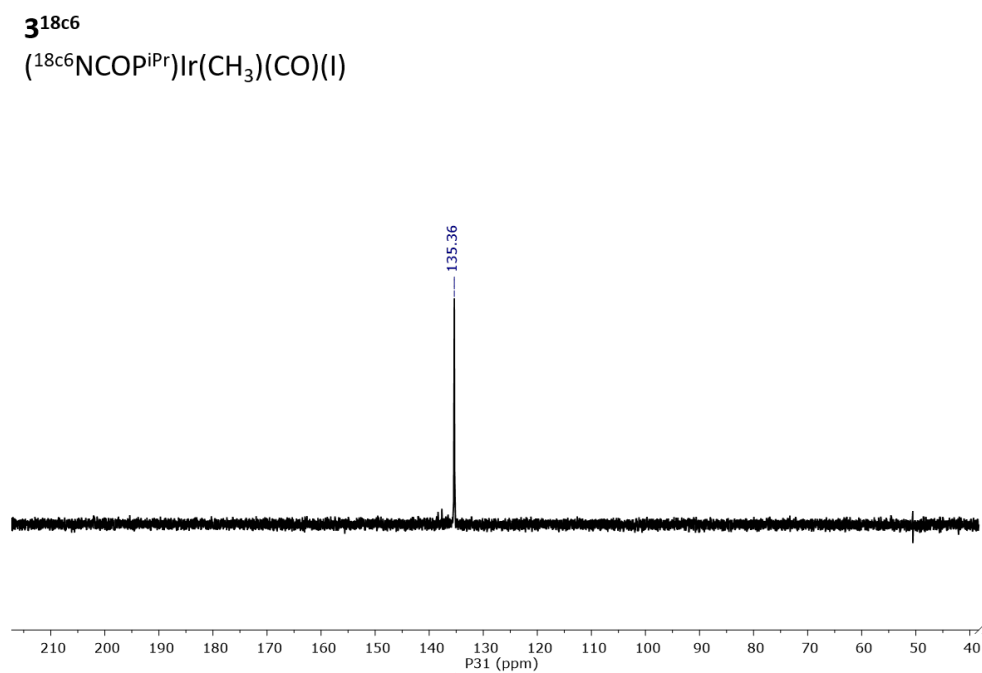

**Figure S9.**  $^{31}\text{P}\{^1\text{H}\}$  NMR spectrum of  $(^{18}\text{C}6\text{NCOPiPr})\text{Ir}(\text{CH}_3)(\text{CO})(\text{I})$  (**3<sup>18c6</sup>**) in  $\text{CD}_2\text{Cl}_2$ .

**5-(aza-18-crown-6 methyl)-2-methoxy phenol.**

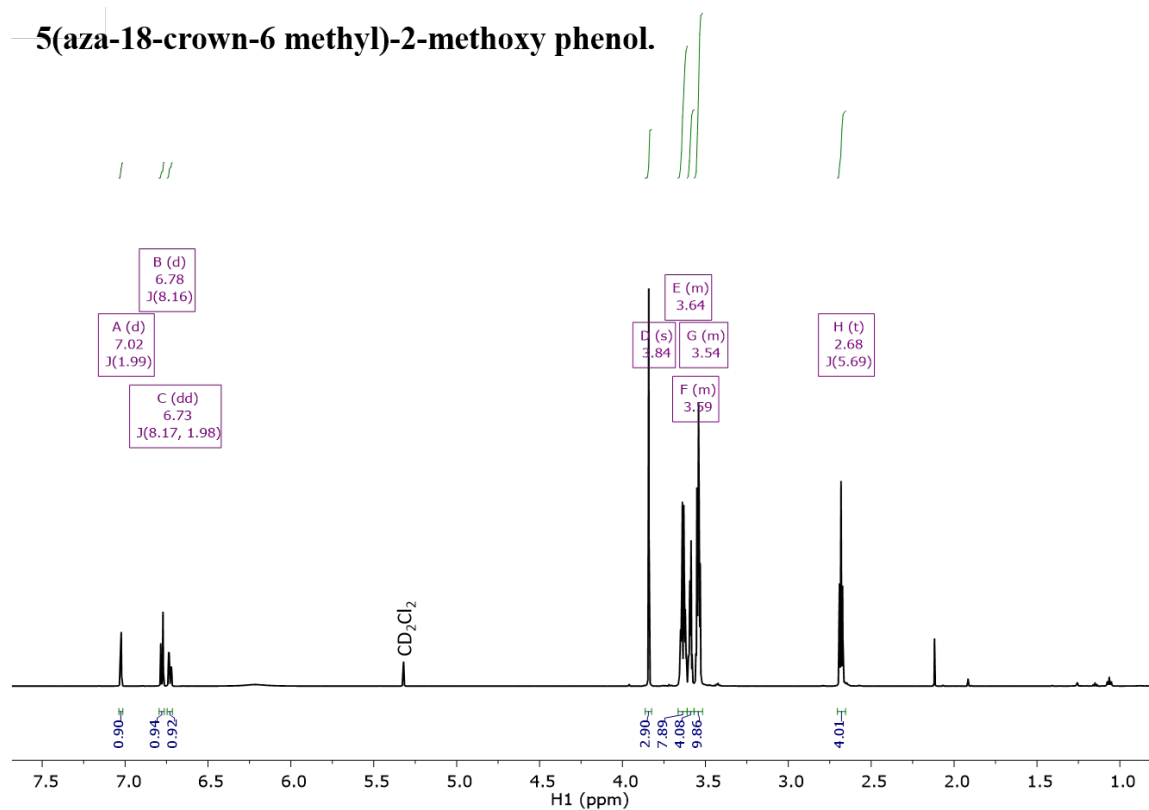

**5-(aza-18-crown-6 methyl)-2-methoxy phenol.**

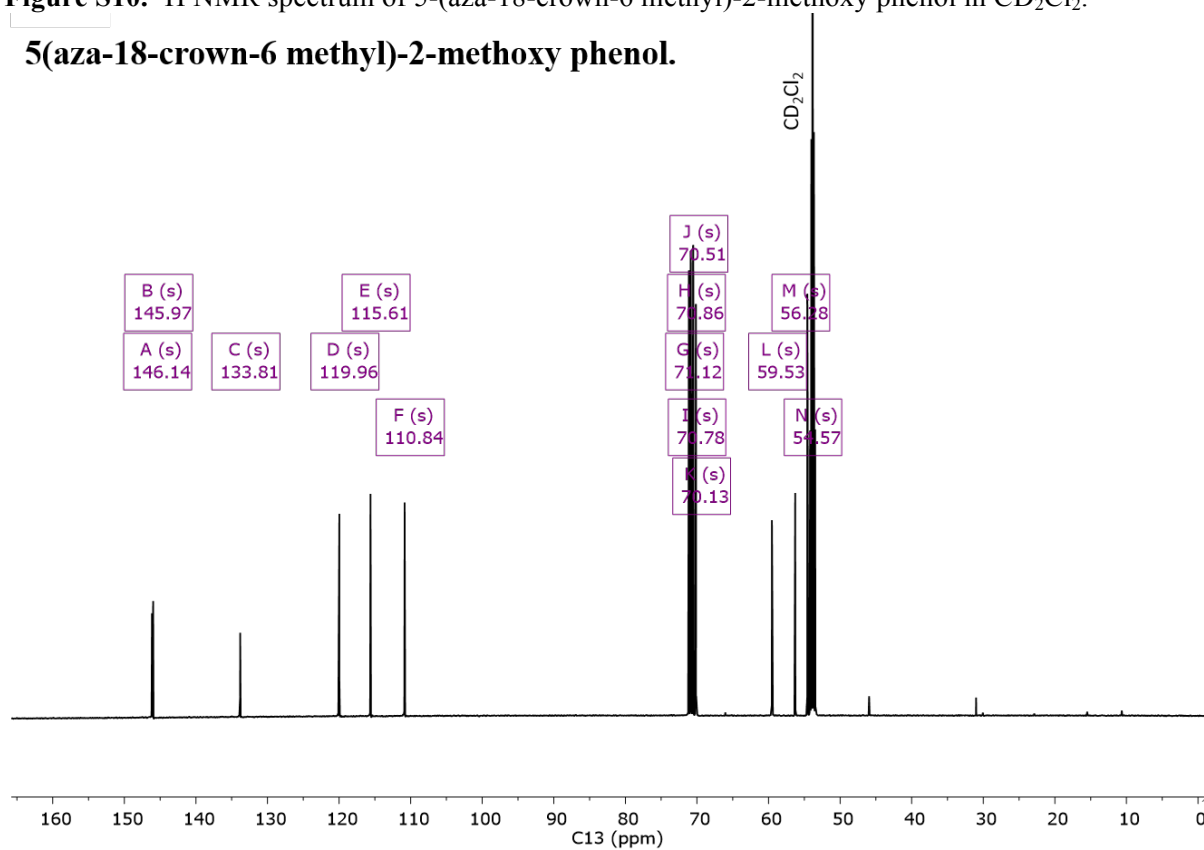



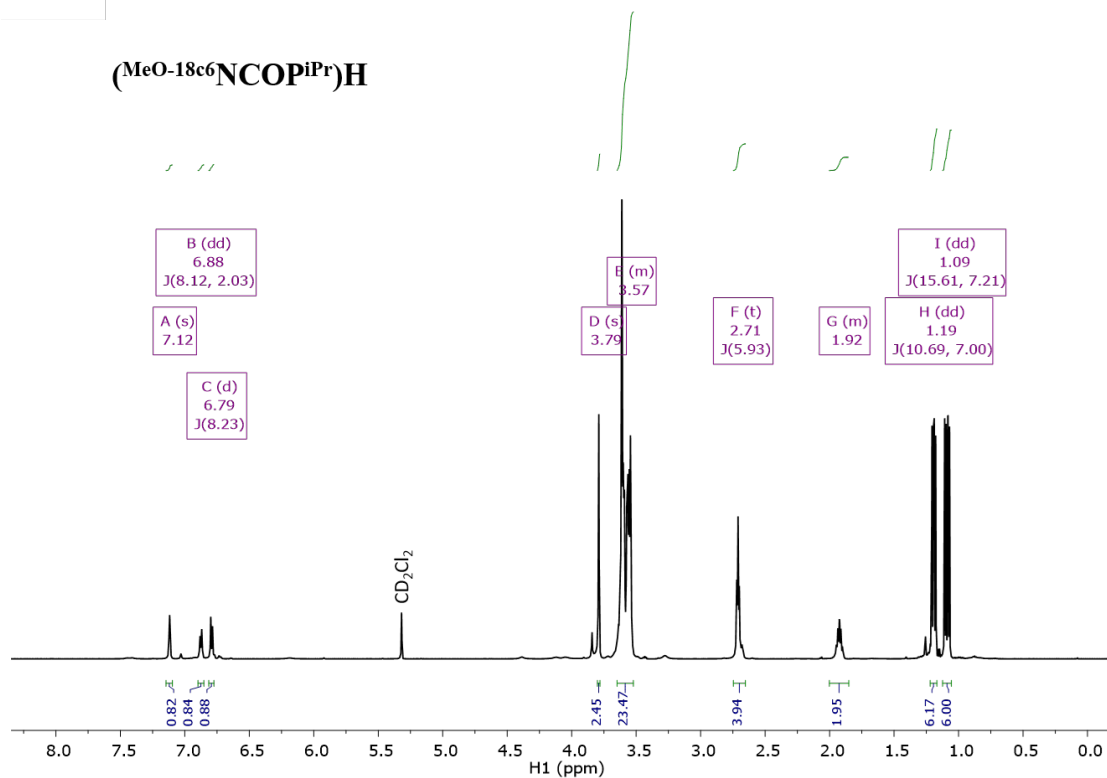

**Figure S12.** <sup>1</sup>H NMR spectrum of (MeO-18c6NCOPiPr)H (**5**<sup>MeO-18c6</sup>) ligand in CD<sub>2</sub>Cl<sub>2</sub>.

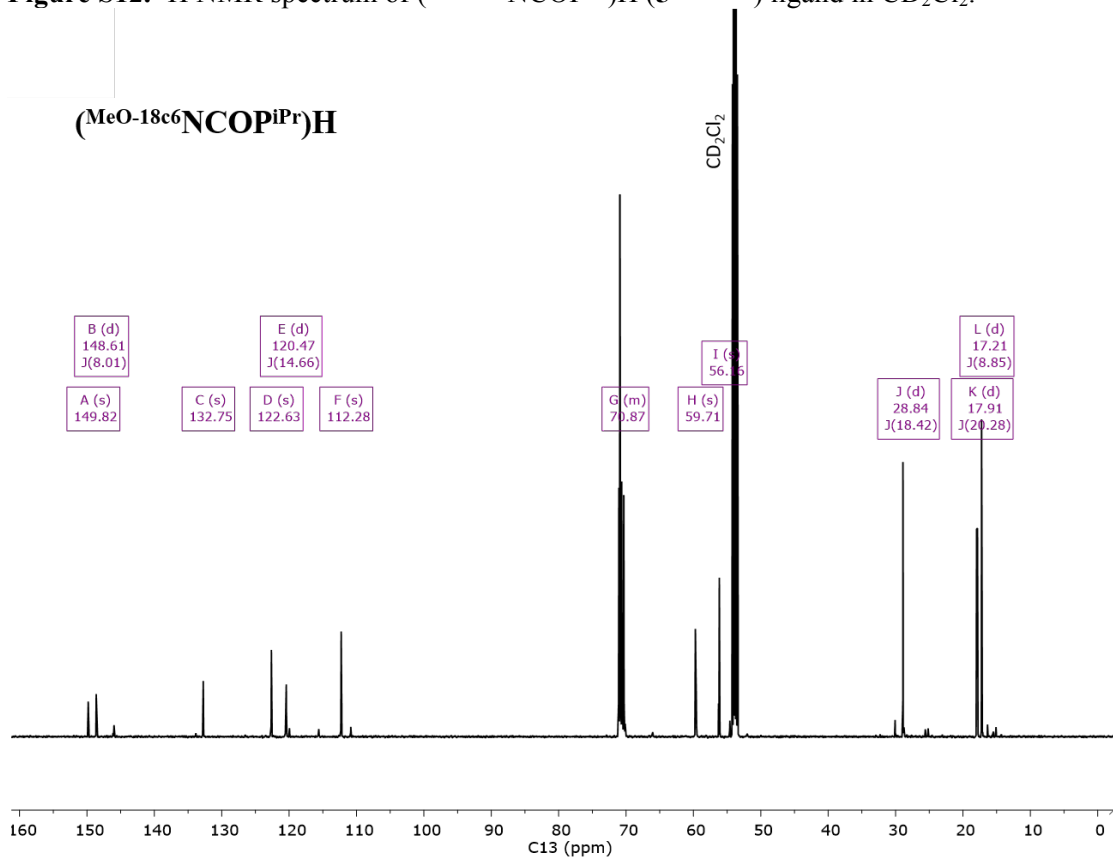

**Figure S13.** <sup>13</sup>C{<sup>1</sup>H} NMR spectrum of (MeO-18c6NCOPiPr)H (**5**<sup>MeO-18c6</sup>) ligand in CD<sub>2</sub>Cl<sub>2</sub>.

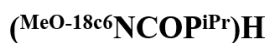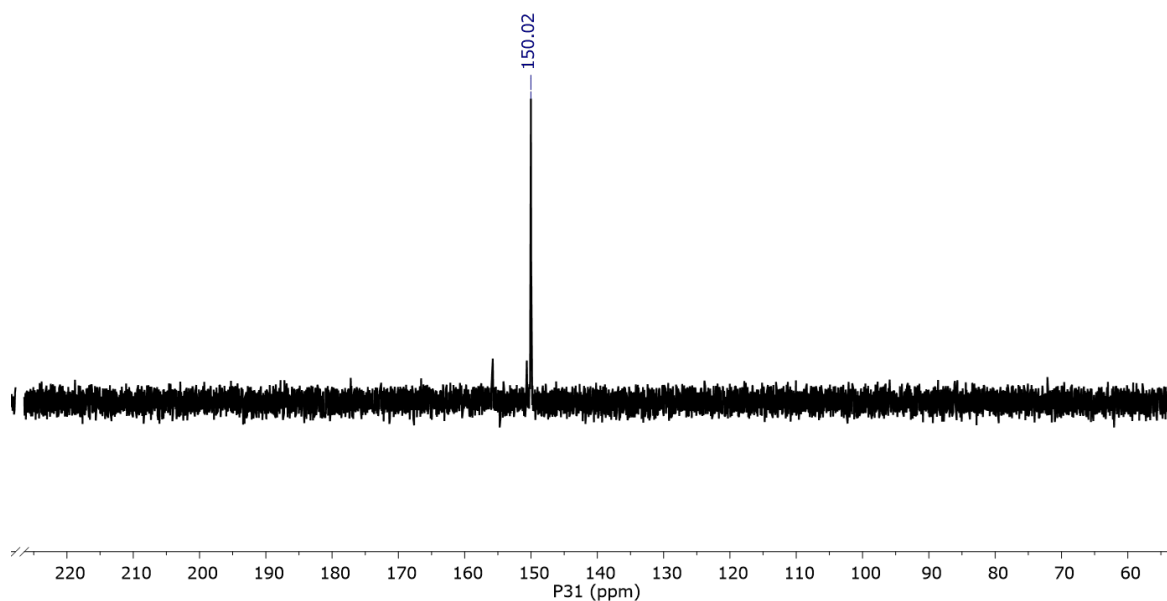

**Figure S14.**  $^{31}\text{P}\{^1\text{H}\}$  NMR spectrum of  $(\text{MeO-18c6NCOPiPr})\text{H}$  (**5** $^{\text{MeO-18c6}}$ ) ligand in  $\text{CD}_2\text{Cl}_2$ .

**1** $^{\text{MeO-18c6}}$

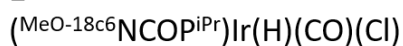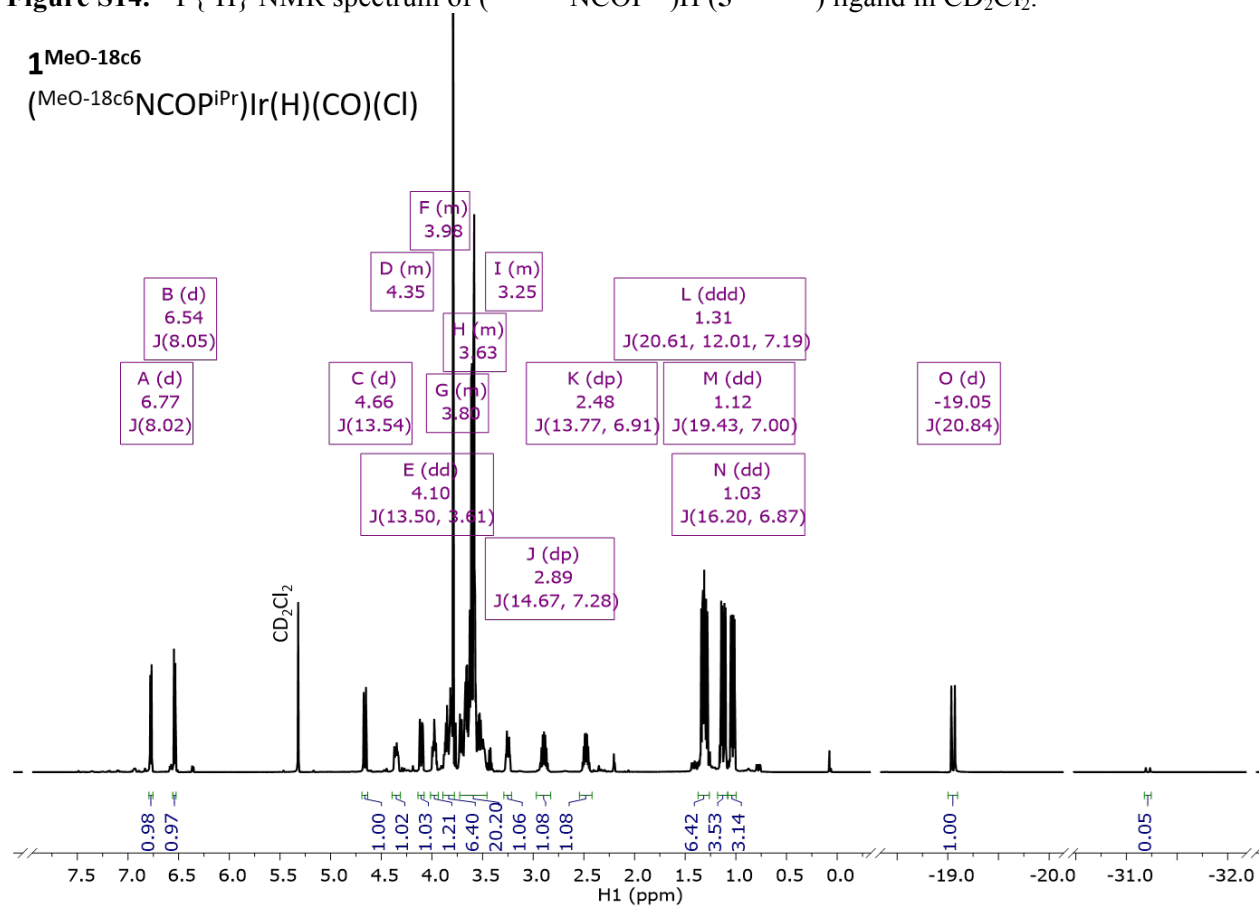

**Figure S15.**  $^1\text{H}$  NMR spectrum of  $(\text{MeO-18c6NCOPiPr})\text{Ir}(\text{H})(\text{CO})(\text{Cl})$  (**1** $^{\text{MeO-18c6}}$ ) in  $\text{CD}_2\text{Cl}_2$ . A second Ir-H is present ( $\delta$  -31) which integrates to less than 5% relative to the major species.

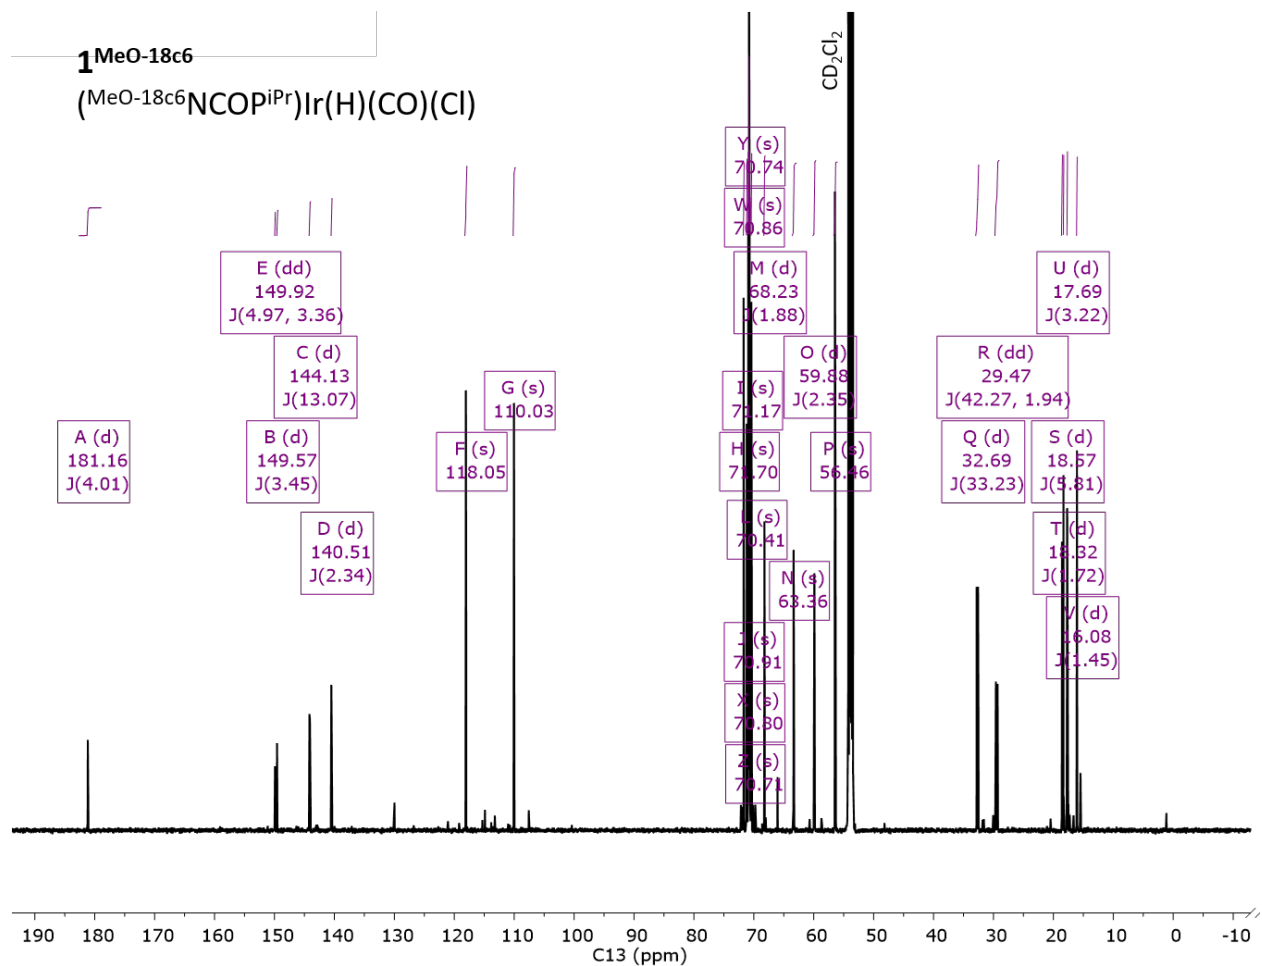

**Figure S16.**  $^{13}\text{C}\{^1\text{H}\}$  NMR spectrum of  $(^{\text{MeO-18c6}}\text{NCOP}^{\text{iPr}})\text{Ir}(\text{H})(\text{CO})(\text{Cl})$  (**1**<sup>MeO-18c6</sup>) in  $\text{CD}_2\text{Cl}_2$ .

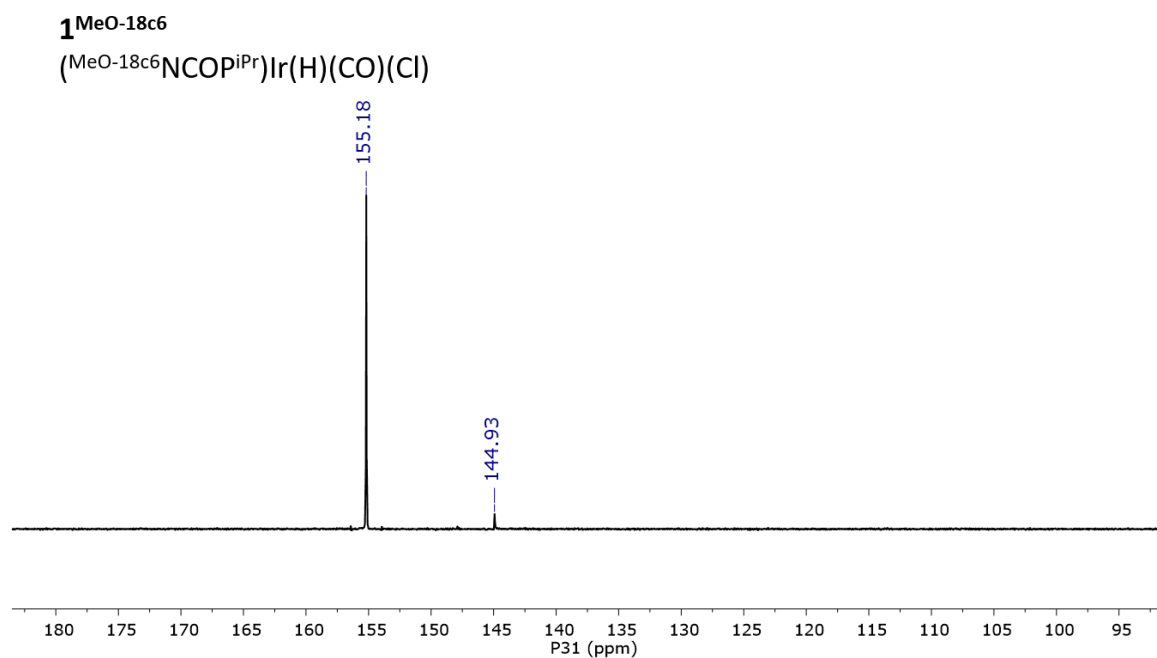

**Figure S17.**  $^{31}\text{P}\{^1\text{H}\}$  NMR spectrum of  $(^{\text{MeO-18c6}}\text{NCOP}^{\text{iPr}})\text{Ir}(\text{H})(\text{CO})(\text{Cl})$  (**1**<sup>MeO-18c6</sup>) in  $\text{CD}_2\text{Cl}_2$ . A <5% impurity is observed ( $\delta$  145).

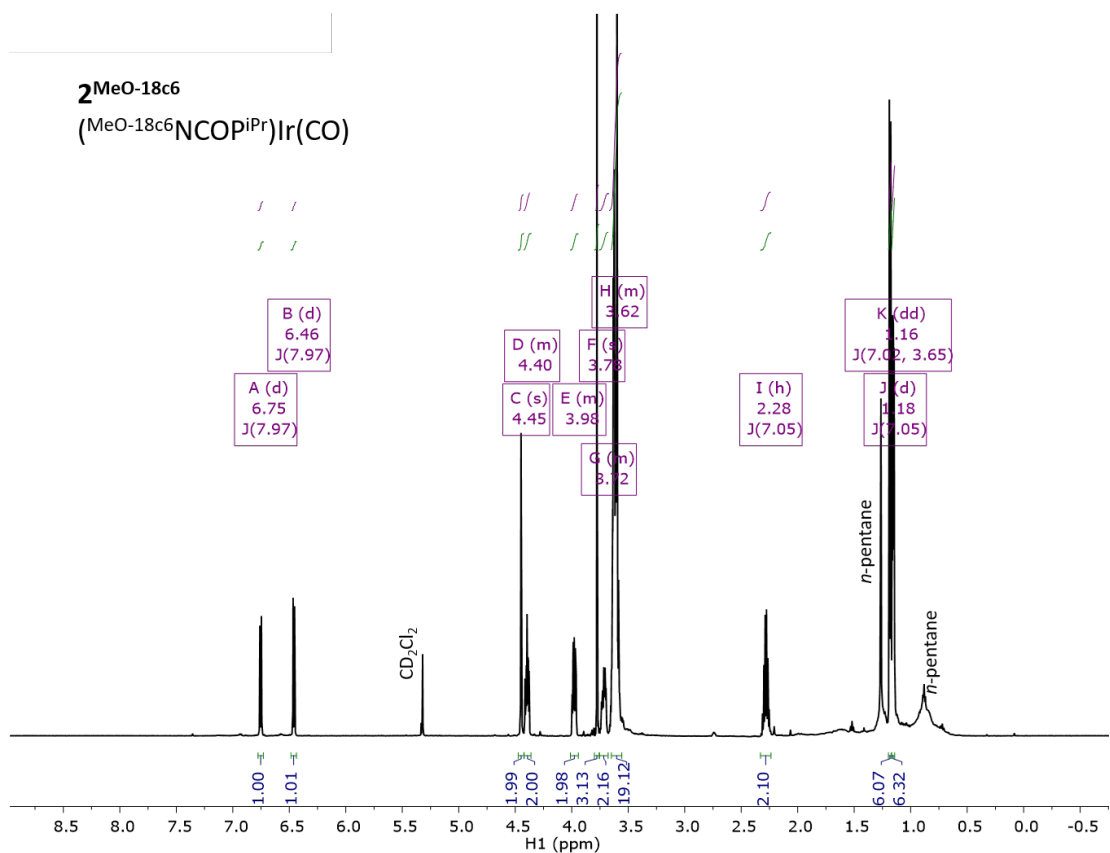

**Figure S18.** <sup>1</sup>H NMR spectrum of (<sup>MeO-18c6</sup>NCOP<sup>iPr</sup>)Ir(CO) (**2<sup>MeO-18c6</sup>**) in CD<sub>2</sub>Cl<sub>2</sub>.

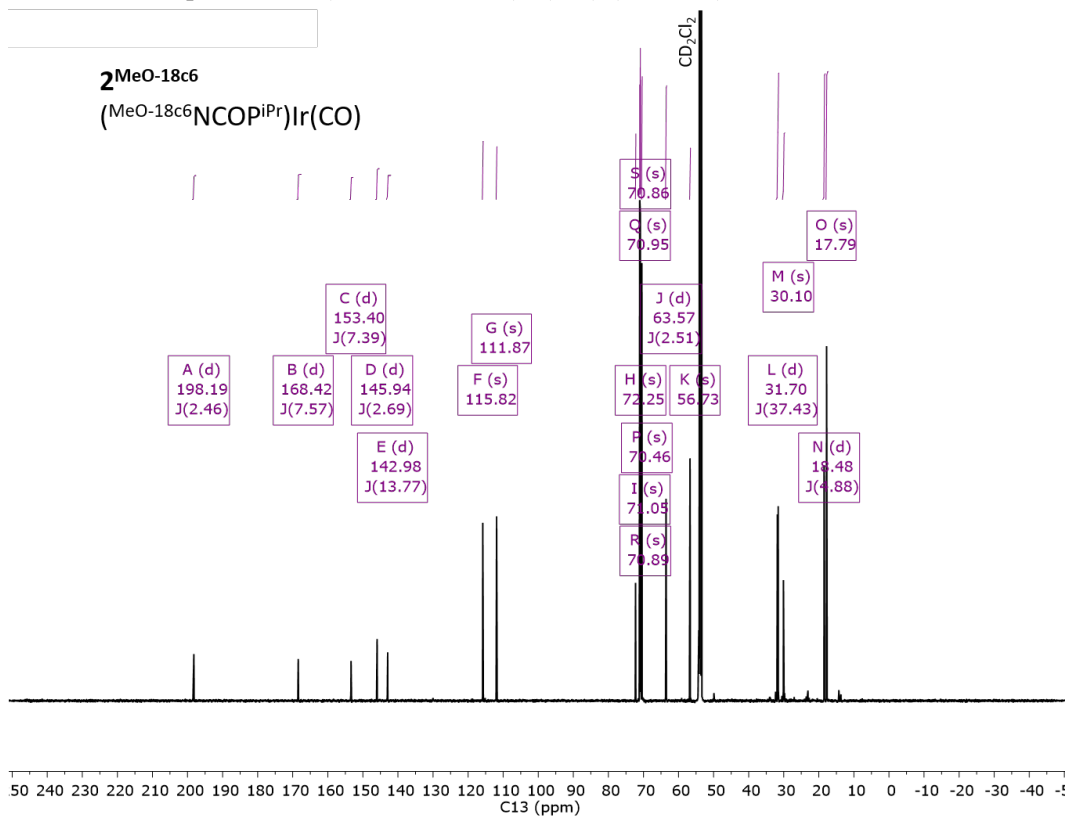

**Figure S19.** <sup>13</sup>C{<sup>1</sup>H} NMR spectrum of (<sup>MeO-18c6</sup>NCOP<sup>iPr</sup>)Ir(CO) (**2<sup>MeO-18c6</sup>**) in CD<sub>2</sub>Cl<sub>2</sub>.

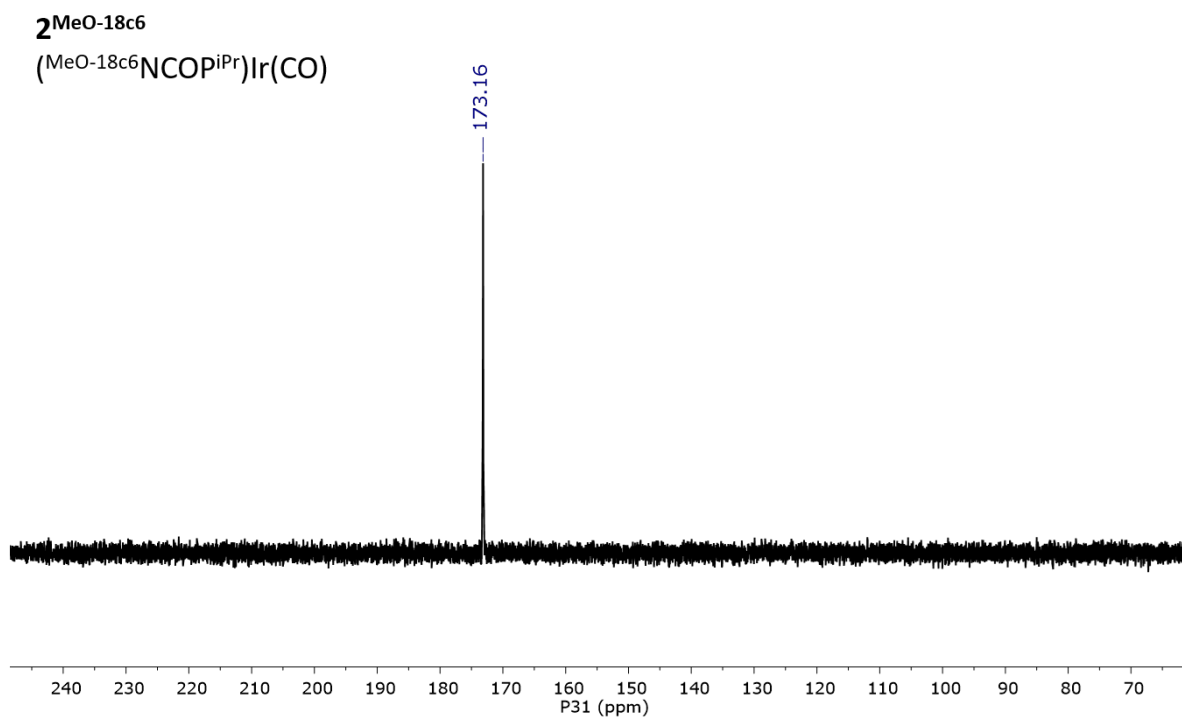

**Figure S20.**  $^{31}\text{P}\{^1\text{H}\}$  spectrum NMR of ( $^{\text{MeO-18c6}}$ NCOP $^{\text{iPr}}$ )Ir(CO) (**2 $^{\text{MeO-18c6}}$** ) in  $\text{CD}_2\text{Cl}_2$ .

## II. Multireactor Catalysis Data

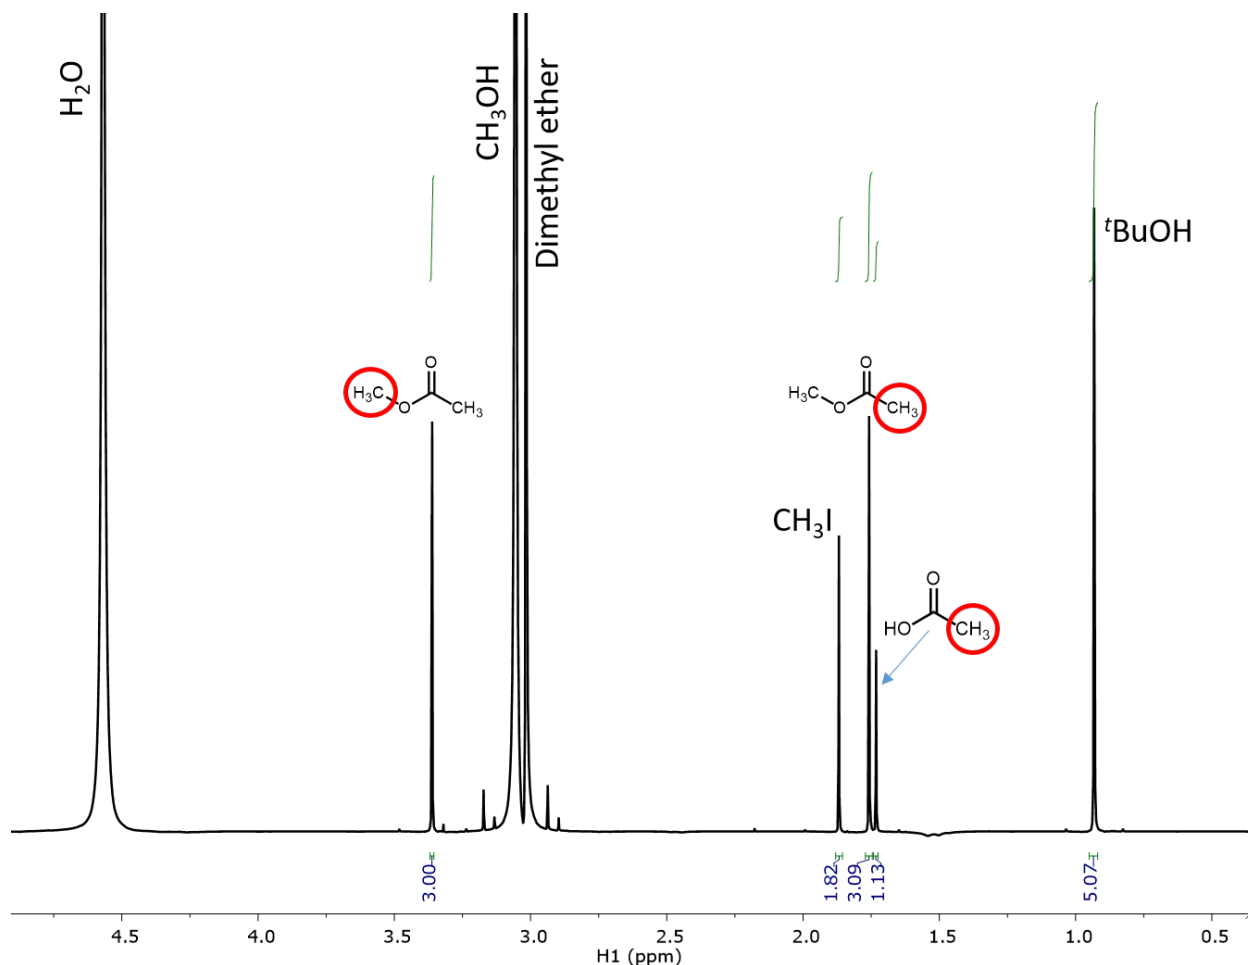

**Figure S21.** Typical  $^1\text{H}$  NMR spectrum after multireactor catalysis. Conditions:  $\text{CH}_3\text{OH}$  solution containing  $t\text{BuOH}$  internal standard,  $\text{CD}_3\text{OD}$  capillary. The product peaks are set to the representative number of protons (3H for each methyl product synthesized) and relative integration against  $t\text{BuOH}$  internal standard is used to calculate the mmol of products:

$$\text{mmol products} = \frac{\text{mmol std.}}{\frac{\text{std. integration}}{9}} = \frac{1.882}{\frac{5.07}{9}} = 3.34 \text{ mmol}$$

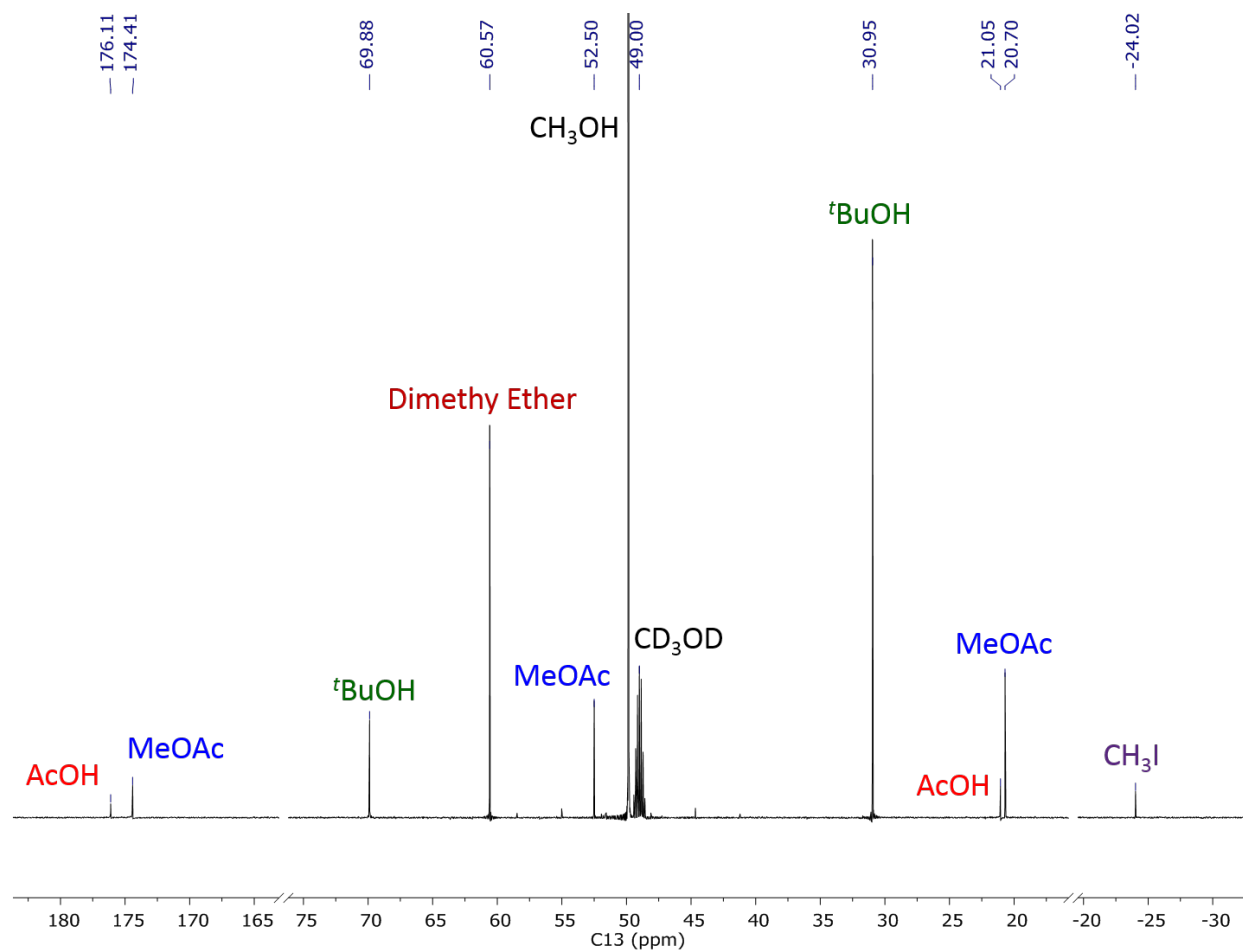

**Figure S22.** Typical  $^{13}\text{C}\{^1\text{H}\}$  NMR spectrum after multireactor catalysis. Conditions:  $\text{CH}_3\text{OH}$  solution containing  $^t\text{BuOH}$  internal standard,  $\text{CD}_3\text{OD}$  capillary.

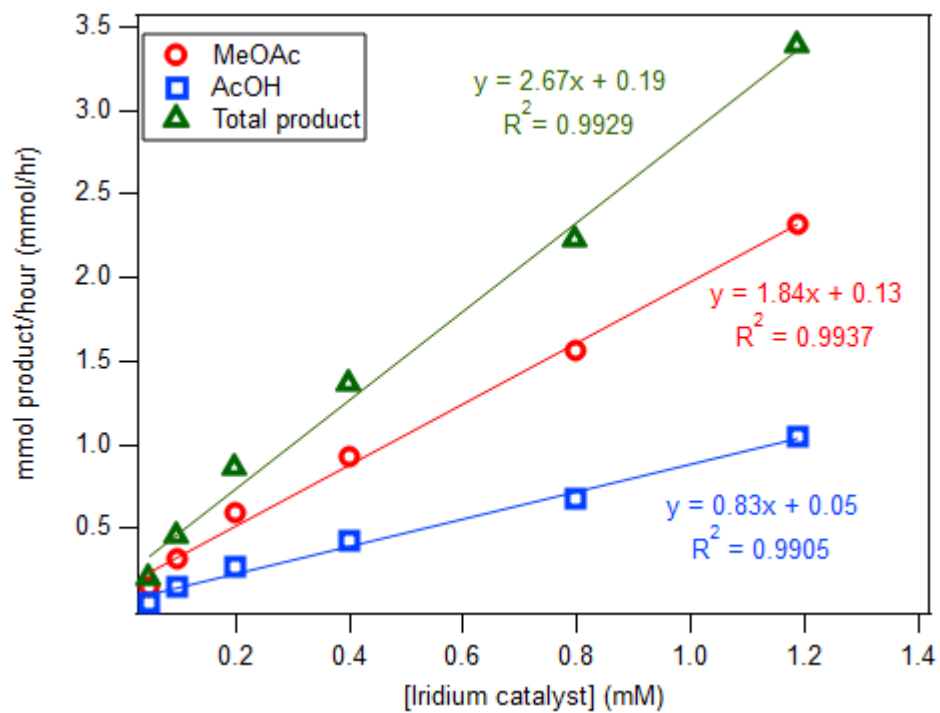

| [Ir] | TON MeOAc | TON AcOH | total TON | TOF     | mmol MeOAc/hr | mmol AcOH/hr | total acyl/hr |
|------|-----------|----------|-----------|---------|---------------|--------------|---------------|
| 0.05 | 814       | 315      | 1129      | 376.425 | 0.14          | 0.05         | 0.19          |
| 0.1  | 926       | 404      | 1330      | 443.317 | 0.31          | 0.14         | 0.44          |
| 0.2  | 881       | 386      | 1267      | 422.365 | 0.59          | 0.26         | 0.85          |
| 0.4  | 701       | 313      | 1013      | 337.72  | 0.93          | 0.42         | 1.35          |
| 0.8  | 585       | 251      | 836       | 278.651 | 1.56          | 0.67         | 2.22          |
| 1.19 | 588       | 266      | 854       | 284.666 | 2.32          | 1.05         | 3.38          |

**Figure S23.** Iridium dependence of methanol carbonylation reaction with  $2^{18c6}$ . Conditions: 150 °C, 3 hours and 25 bar CO with 0.5 M  $CH_3I$ .



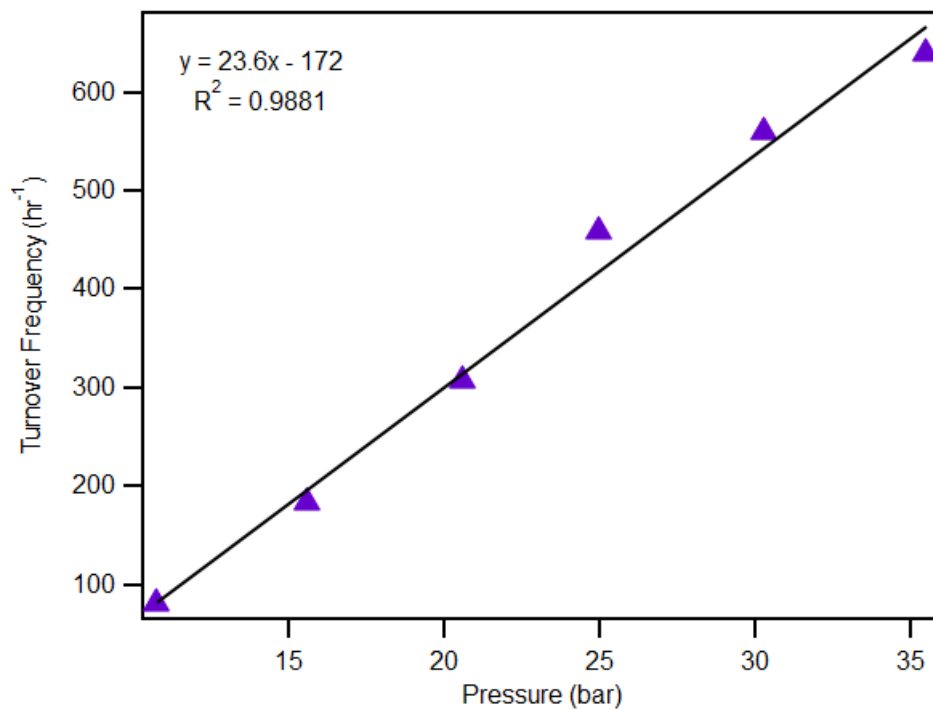

| Pressure (bar) | TON MeOAc | TON AcOH | Total TON | TOF(hr-1) |
|----------------|-----------|----------|-----------|-----------|
| 10.78          | 194       | 47       | 241       | 80        |
| 15.62          | 408       | 139      | 547       | 182       |
| 20.64          | 720       | 199      | 919       | 306       |
| 25             | 1011      | 360      | 1371      | 457       |
| 30.3           | 1271      | 407      | 1678      | 559       |
| 35.5           | 1192      | 723      | 1915      | 638       |

**Figure S24.** CO pressure dependence of methanol carbonylation reaction with  $2^{18c6}$ . Conditions: 150 °C, 3 hours and 0.34 mM [Ir] with 0.5 M CH<sub>3</sub>I.

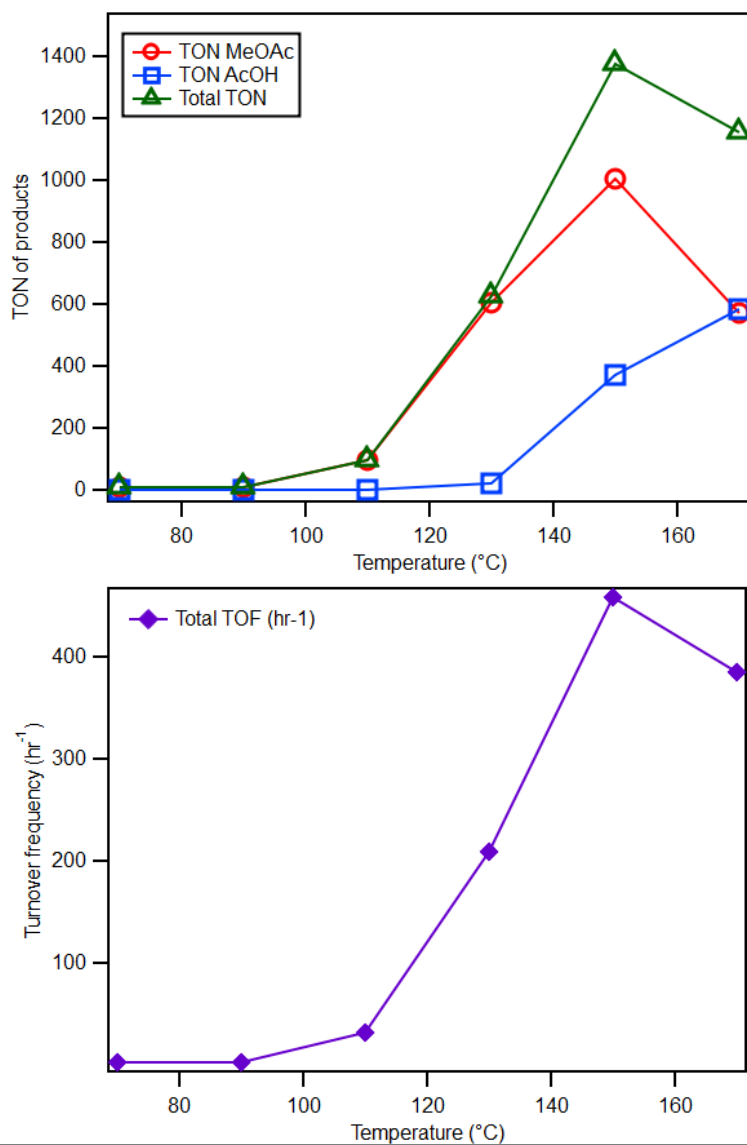

| Temperature | TON MeOAc | TON AcOH | Total TON | TOF (hr-1) |
|-------------|-----------|----------|-----------|------------|
| 70          | 7         | 0        | 7         | 2.37119    |
| 90          | 8         | 0        | 8         | 2.62393    |
| 110         | 96        | 0        | 96        | 31.8806    |
| 130         | 606       | 20       | 626       | 208.726    |
| 150         | 1004      | 370      | 1375      | 458.188    |
| 170         | 572       | 583      | 1155      | 385.118    |

**Figure S25.** Temperature dependence of methanol carbonylation reaction with **2**<sup>18c6</sup>. Conditions: 3 hours, 25 bar and 0.34 mM [Ir] with 0.5 M CH<sub>3</sub>I.

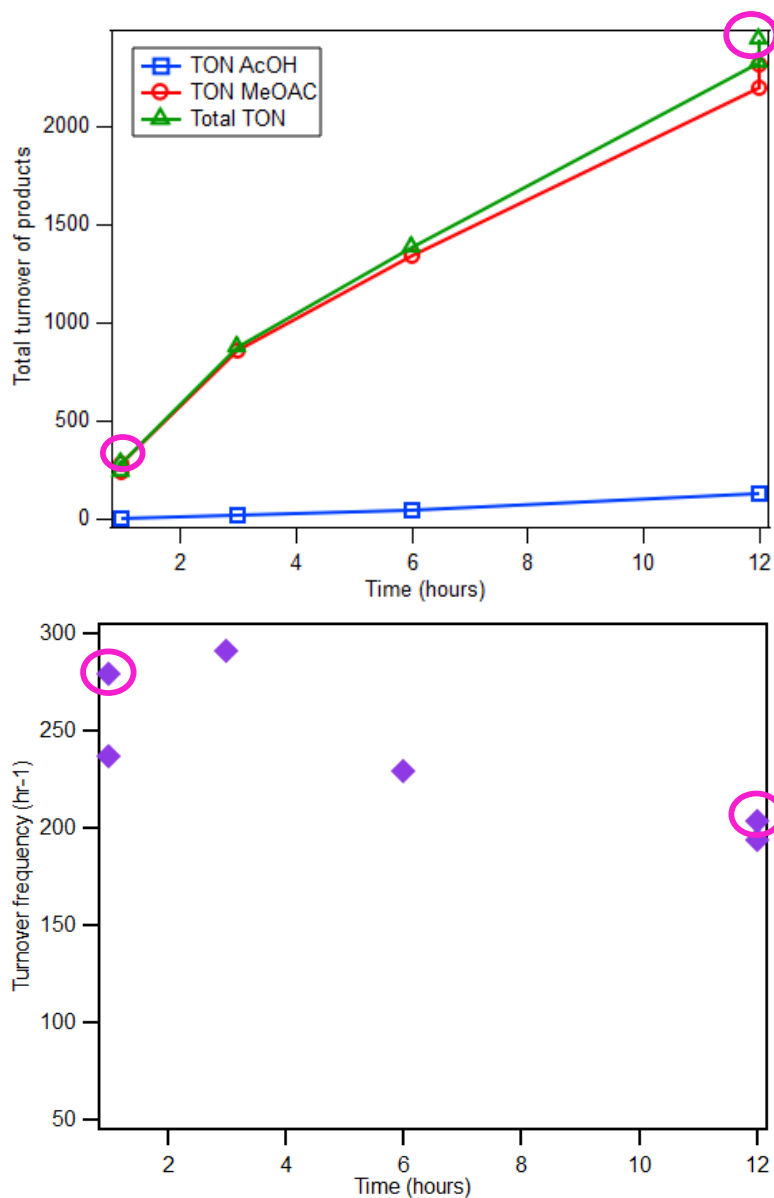

| Hours | additive | TON_MeOAC | TON_AcOH | Total_TON | TOF     |
|-------|----------|-----------|----------|-----------|---------|
| 1     |          | 237       | 0        | 237       | 236.674 |
| 1     | 10       | 279       | 0        | 279       | 279.416 |
| 3     |          | 857       | 15       | 872       | 290.674 |
| 6     |          | 1336      | 41       | 1377      | 229.461 |
| 12    |          | 2195      | 128      | 2323      | 193.548 |
| 12    | 10       | 2317      | 123      | 2440      | 203.313 |

**Figure S26.** Turnover frequency of methanol carbonylation with  $2^{18c6}$  at different reaction times. Conditions: 25 bar and 0.34 mM [Ir] with 0.1 M  $\text{CH}_3\text{I}$  at 150 °C. Data points circled in pink contained 10 equivalents (3.4 mM) of [TBA][I].

**Table S1.** Lewis acid screening with (<sup>18c6</sup>NCOP<sup>iPr</sup>)Ir(CO) (**2**<sup>18c6</sup>)<sup>a</sup>

| <b>Lewis acid Salt<sup>a</sup></b> | <b>TON CH<sub>3</sub>OAc</b> | <b>TON AcOH</b> | <b>Total TON</b> | <b>Promotion Factor<sup>b</sup></b> |
|------------------------------------|------------------------------|-----------------|------------------|-------------------------------------|
| La(OTf) <sub>3</sub>               | 510                          | 10              | 520              | 0.53                                |
| LaI <sub>3</sub>                   | 680                          | 10              | 690              | 0.70                                |
| CeCl <sub>3</sub>                  | 680                          | 30              | 710              | 0.73                                |
| Ce(OTf) <sub>3</sub>               | 760                          | 30              | 790              | 0.81                                |
| Gal <sub>3</sub>                   | 900                          | 20              | 920              | 0.94                                |
| No additive                        | 940                          | 40              | 980              | -                                   |
| NaCl                               | 1040                         | 30              | 1070             | 1.09                                |
| HfCl <sub>4</sub>                  | 1080                         | 30              | 1110             | 1.13                                |
| ZrCl <sub>4</sub>                  | 1090                         | 40              | 1130             | 1.15                                |
| KCl                                | 1110                         | 40              | 1150             | 1.18                                |
| LiCl                               | 1150                         | 40              | 1190             | 1.21                                |

<sup>a</sup> Conditions: 150 °C, 25 bar CO, 3 h, 0.1 M CH<sub>3</sub>I, 0.34 mM Ir catalyst, 0.34 mM Lewis acid.<sup>b</sup> Calculated as a ratio of total TON/TON with no Lewis acid present.**Table S2.** Electrolyte screening with (<sup>18c6</sup>NCOP<sup>iPr</sup>)Ir(CO) (**2**<sup>18c6</sup>)<sup>a</sup>

| <b>Electrolyte</b> | <b>TON CH<sub>3</sub>OAc</b> | <b>TON AcOH</b> | <b>Total TON</b> | <b>Promotion Factor<sup>b</sup></b> |
|--------------------|------------------------------|-----------------|------------------|-------------------------------------|
| No additive        | 940                          | 40              | 980              | -                                   |
| [TBA][OTf]         | 970                          | 20              | 990              | 1.01                                |
| [TBA][I]           | 1430                         | 40              | 1470             | 1.50                                |

<sup>a</sup> Conditions: 150 °C, 25 bar CO, 3 hr, 0.1 M CH<sub>3</sub>I, 0.34 mM Ir catalyst, 3.4 mM electrolyte.<sup>b</sup> Calculated as a ratio of total TON/TON with no Lewis acid present.**Table S3.** Catalytic runs with both Lewis Acid salts and added Electrolyte with (<sup>18c6</sup>NCOP<sup>iPr</sup>)Ir(CO) (**2**<sup>18c6</sup>)<sup>a</sup>

| <b>Electrolyte</b>      | <b>Salt</b>          | <b>TON CH<sub>3</sub>OAc</b> | <b>TON AcOH</b> | <b>Total TON</b> | <b>Promotion Factor<sup>b</sup></b> |
|-------------------------|----------------------|------------------------------|-----------------|------------------|-------------------------------------|
| [TBA][OTf]              | LaOTf <sub>3</sub>   | 900                          | 20              | 920              | 0.94                                |
| [TBA][OTf]              | LaI <sub>3</sub>     | 930                          | 20              | 950              | 0.97                                |
| None                    | None                 | 940                          | 40              | 980              | -                                   |
| [TBA][OTf]              | None                 | 970                          | 20              | 990              | 1.01                                |
| [TBA][OTf]              | ZrCl <sub>4</sub>    | 1200                         | 20              | 1220             | 1.24                                |
| [TBA][OTf]              | Ce(OTf) <sub>3</sub> | 1210                         | 20              | 1230             | 1.26                                |
| [TBA][OTf]              | LiCl                 | 1250                         | 10              | 1260             | 1.29                                |
| [TBA][OTf]              | HfCl <sub>4</sub>    | 1270                         | 40              | 1310             | 1.34                                |
| [TBA][OTf] <sup>c</sup> | HfCl <sub>4</sub>    | 1540                         | 40              | 1580             | 1.61                                |

<sup>a</sup> Conditions: 150 °C, 25 bar CO, 3 hr, 0.1 M CH<sub>3</sub>I, 0.34 mM Ir catalyst, 3.4 mM electrolyte, 0.34 mM salt.<sup>b</sup> Calculated as a ratio of total TON/TON with no Lewis acid or electrolyte present.<sup>c</sup> Catalyst formed in situ from [PPN][Ir(CO)<sub>2</sub>I<sub>2</sub>] and (<sup>18c6</sup>NCOP<sup>iPr</sup>)H.

**Table S4.** Lewis acid screening with (<sup>MeO-18c6</sup>NCOP<sup>iPr</sup>)Ir(CO) (**2<sup>MeO-18c6</sup>**)<sup>a</sup>

| Lewis acid           | TON CH <sub>3</sub> OAc | TON AcOH | Total TON | Promotion Factor <sup>b</sup> |
|----------------------|-------------------------|----------|-----------|-------------------------------|
| ZrCl <sub>4</sub>    | 520                     | 10       | 530       | 0.35                          |
| LaI <sub>3</sub>     | 660                     | 20       | 680       | 0.45                          |
| La(OTf) <sub>3</sub> | 670                     | 10       | 680       | 0.45                          |
| GaI <sub>3</sub>     | 1220                    | 40       | 1260      | 0.84                          |
| LiCl                 | 1240                    | 20       | 1260      | 0.84                          |
| [TBA][I]             | 1280                    | 30       | 1320      | 0.88                          |
| HfCl <sub>4</sub>    | 1290                    | 40       | 1330      | 0.88                          |
| None                 | 1450                    | 50       | 1500      | -                             |
| [TBA][OTf]           | 1630                    | 40       | 1670      | 1.11                          |
| [TBA][Cl]            | 1650                    | 40       | 1690      | 1.13                          |

<sup>a</sup>Conditions: 150 °C, 25 bar CO, 3 hr, 0.1 M CH<sub>3</sub>I, 0.34 mM Ir catalyst, 3.4 mM electrolyte, 0.34 mM Lewis acid.

<sup>b</sup>Calculated as a ratio of total TON/TON with no Lewis acid.

**Table S5.** Lewis acid screening with (<sup>MeO-15c5</sup>NCOP<sup>iPr</sup>)Ir(CO) (**2<sup>MeO-15c5</sup>**)<sup>a</sup>

| Lewis Acid           | TON CH <sub>3</sub> OAc | TON AcOH | Total TON | Promotion Factor <sup>b</sup> |
|----------------------|-------------------------|----------|-----------|-------------------------------|
| La(OTf) <sub>3</sub> | 790                     | 5        | 795       | 0.81                          |
| LaI <sub>3</sub>     | 820                     | 20       | 840       | 0.87                          |
| ZrCl <sub>4</sub>    | 950                     | 10       | 960       | 0.99                          |
| None                 | 970                     | 0        | 970       | -                             |
| GaI <sub>3</sub>     | 1020                    | 10       | 1030      | 1.06                          |
| HfCl <sub>4</sub>    | 1230                    | 20       | 1250      | 1.29                          |
| [TBA][OTf]           | 1300                    | 40       | 1340      | 1.38                          |
| LiCl                 | 1560                    | 50       | 1610      | 1.66                          |
| [TBA][I]             | 1720                    | 20       | 1740      | 1.80                          |
| [TBA][Cl]            | 1940                    | 10       | 1950      | 2.01                          |

<sup>a</sup>Conditions: 150 °C, 25 bar CO, 3 hr, 0.1 M CH<sub>3</sub>I, 0.34 mM Ir catalyst, 3.4 mM electrolyte, and 0.34 mM Lewis acid.

<sup>b</sup>Calculated as a ratio of total TON/TON with no Lewis acid.

**Table S6.** Catalytic methanol carbonylation by [PPN][Ir(CO)<sub>2</sub>I<sub>2</sub>] under standard conditions

| Lewis acid | TON CH <sub>3</sub> OAc | TON AcOH | Total TON | Promotion Factor <sup>b</sup> |
|------------|-------------------------|----------|-----------|-------------------------------|
| None       | 1800                    | 70       | 1870      | -                             |
| LiCl       | 2220                    | 180      | 2400      | 1.28                          |
| [TBA][I]   | 1800                    | 70       | 1870      | 1.00                          |

<sup>a</sup>Conditions: 150 °C, 25 bar CO, 3 hr, 0.1 M CH<sub>3</sub>I, 0.34 mM Ir catalyst, 0.34 mM Lewis acid.

<sup>b</sup>Calculated as a ratio of total TON/TON with no Lewis acid.

### III. NMR Studies: Catalyst Speciation and Turnover Under Various Conditions

#### A. Catalysis speciation after reactor runs

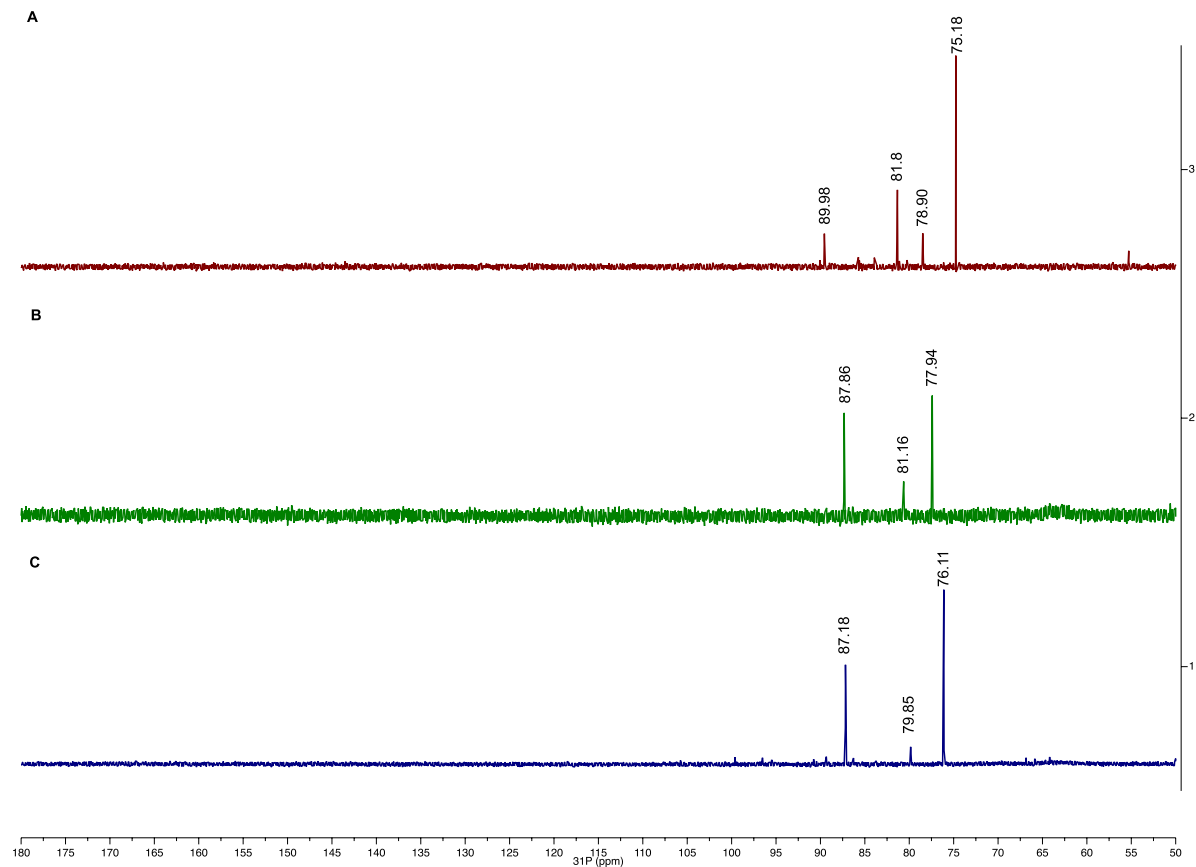

**Figure S27.**  $^{31}\text{P}\{^1\text{H}\}$  NMR spectra of the reaction mixture following methanol carbonylation catalysis in the presence of 0.1 M  $\text{CH}_3\text{I}$  at 25 bar CO for 3 h using  $(^{18}\text{c}6\text{NCOP}^{\text{iPr}})\text{Ir}(\text{CO})$  ( $2^{18\text{c}6}$ ) at 130 °C (A),  $(^{\text{MeO-}15\text{c}5}\text{NCOP}^{\text{iPr}})\text{Ir}(\text{CO})$  ( $2^{\text{MeO-}15\text{c}5}$ ) and 1 equiv LiCl at 150 °C (B), and  $(^{\text{MeO-}18\text{c}6}\text{NCOP}^{\text{iPr}})\text{Ir}(\text{CO})$  ( $2^{\text{MeO-}18\text{c}6}$ ) at 150 °C (C).

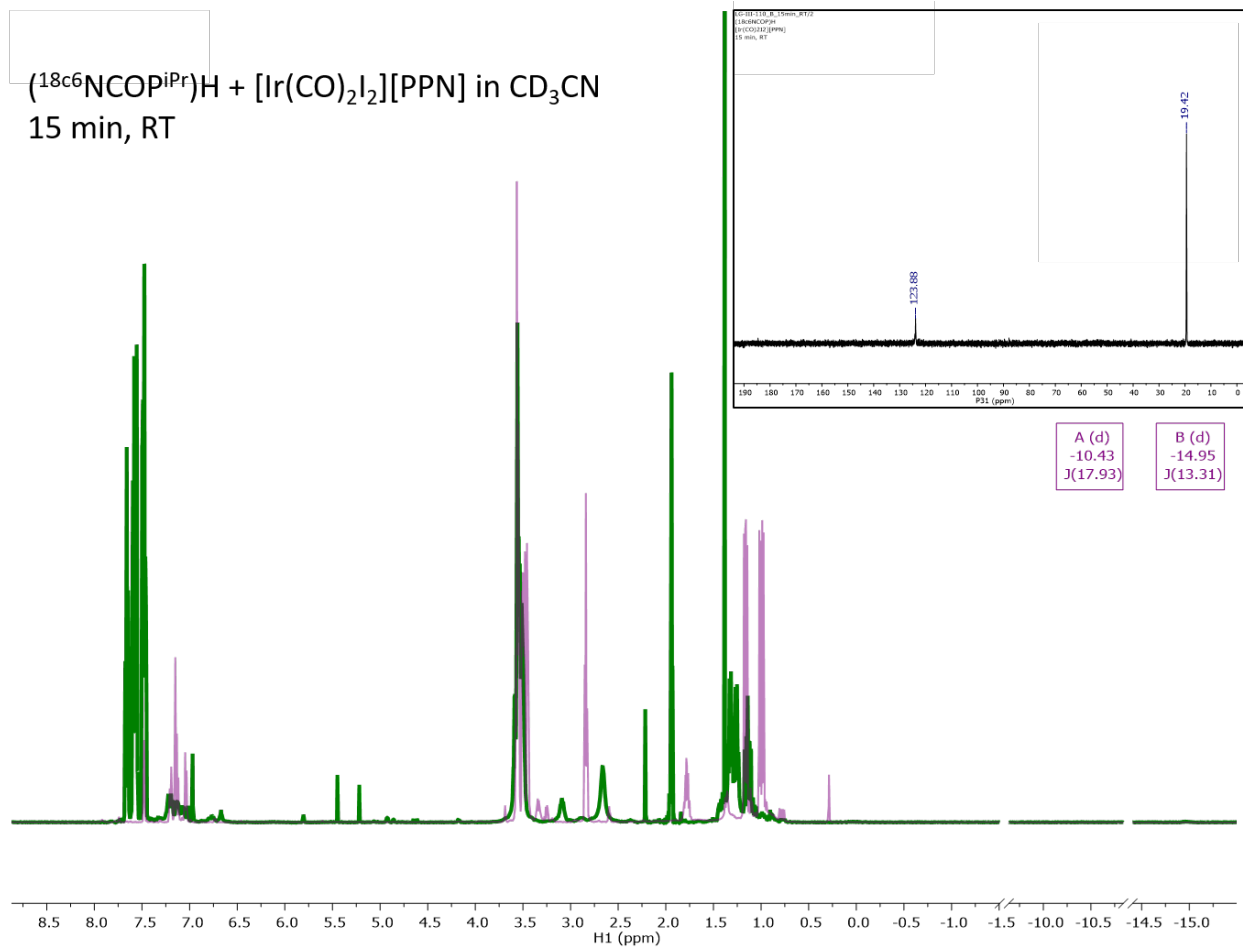

**Figure S28.**  $^1\text{H}$  NMR spectrum of the product formed after mixing ( $^{18}\text{C}6\text{NCOP}^{\text{iPr}}\text{H}$ ) and  $[\text{PPN}][\text{Ir}(\text{CO})_2\text{I}_2]$  in  $\text{CD}_3\text{CN}$  (green) overlaid with a spectrum of free ligand ( $^{18}\text{C}6\text{NCOP}^{\text{iPr}}\text{H}$ ) (purple). Shifts in the isopropyl protons ( $\delta$  1.0-1.5) are indicative of coordination of the phosphine to the iridium center. Inset:  $^{31}\text{P}\{^1\text{H}\}$  NMR shows formation of a single major product ( $\delta$  124) along with  $[\text{PPN}]^+$  ( $\delta$  19).

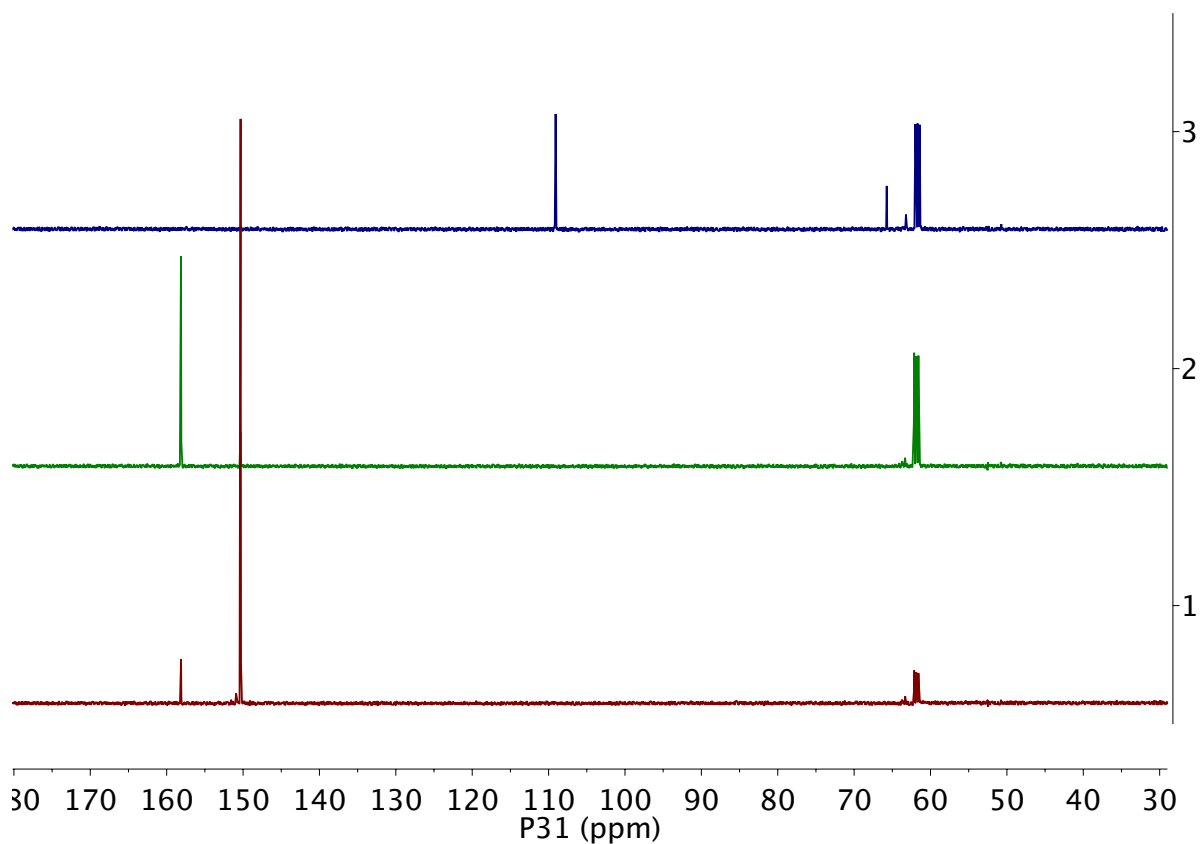

**Figure S29.**  $^{31}\text{P}\{^1\text{H}\}$  NMR spectra of  $(^{15}\text{c}^5\text{NCOP}^{\text{iPr}})\text{H}$  in  $\text{CD}_3\text{OD}$  after 0.5 h (bottom red trace), 22 h (middle green trace), and after addition of  $35\ \mu\text{L}$   $\text{CH}_3\text{I}$  (top blue trace). The species are tentatively assigned as follows:  $(^{15}\text{c}^5\text{NCOP}^{\text{iPr}})\text{H}$  ( $\delta$  147),  $\text{iPr}_2\text{POCD}_3$  ( $\delta$  158),  $\text{iPr}_2\text{P}(\text{O})\text{D}$  ( $\delta$  61.8, 1:1:1 t,  $J_{\text{PD}} = 68\ \text{Hz}$ ),  $[\text{iPr}_2\text{P}(\text{CH}_3)(\text{OCH}_3)]^+$  ( $\delta$  109).



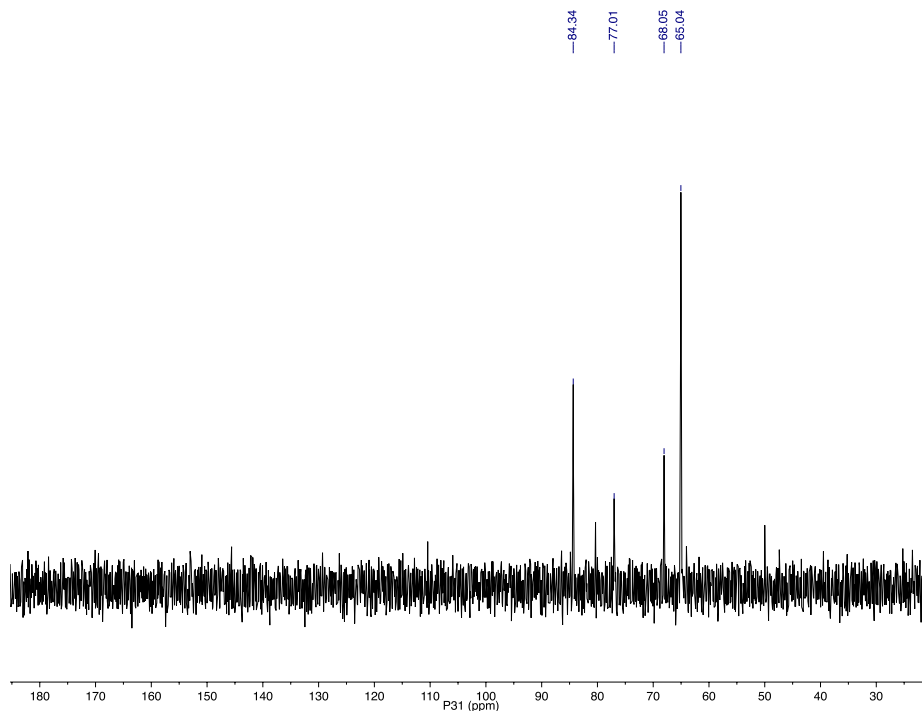

**Figure S30.**  $^{31}\text{P}\{^1\text{H}\}$  NMR spectrum after carbonylation reaction using 2.5 mM  $(^{18}\text{C}6\text{NCOP}^i\text{Pr})\text{Ir}(\text{CO})$  and 0.74 mM MeI pressurized with 25 bar CO and heated to 150 °C for 6 h.

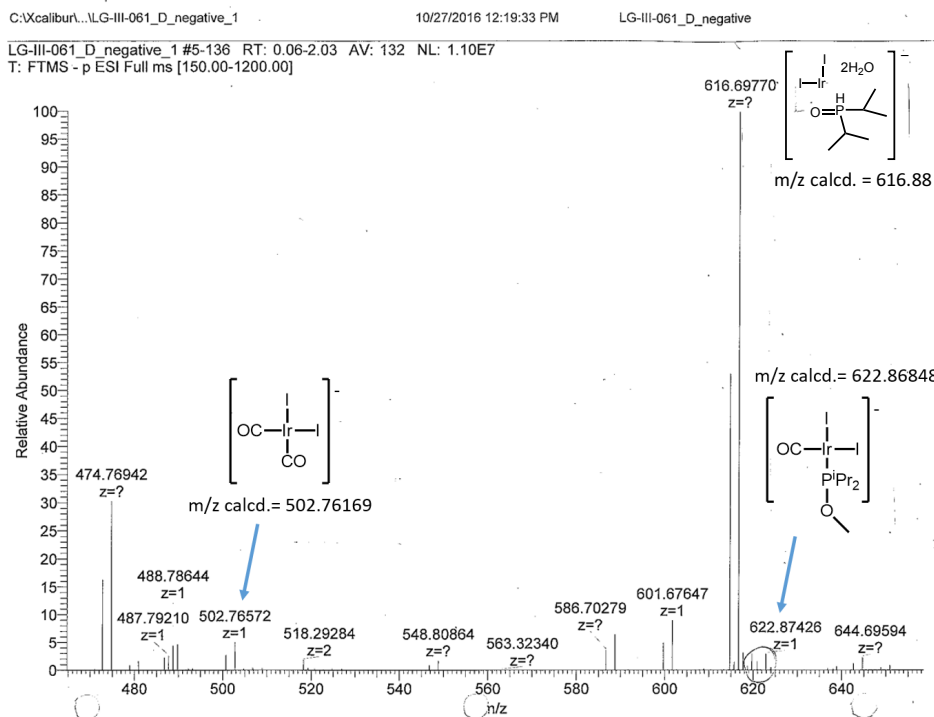

**Figure S31.** Electrospray mass spectrometry after carbonylation reaction using 2.5 mM  $(^{18}\text{C}6\text{NCOP}^i\text{Pr})\text{Ir}(\text{CO})$  and 0.74 mM MeI pressurized with 25 bar CO and heated to 150 °C for 6 h.

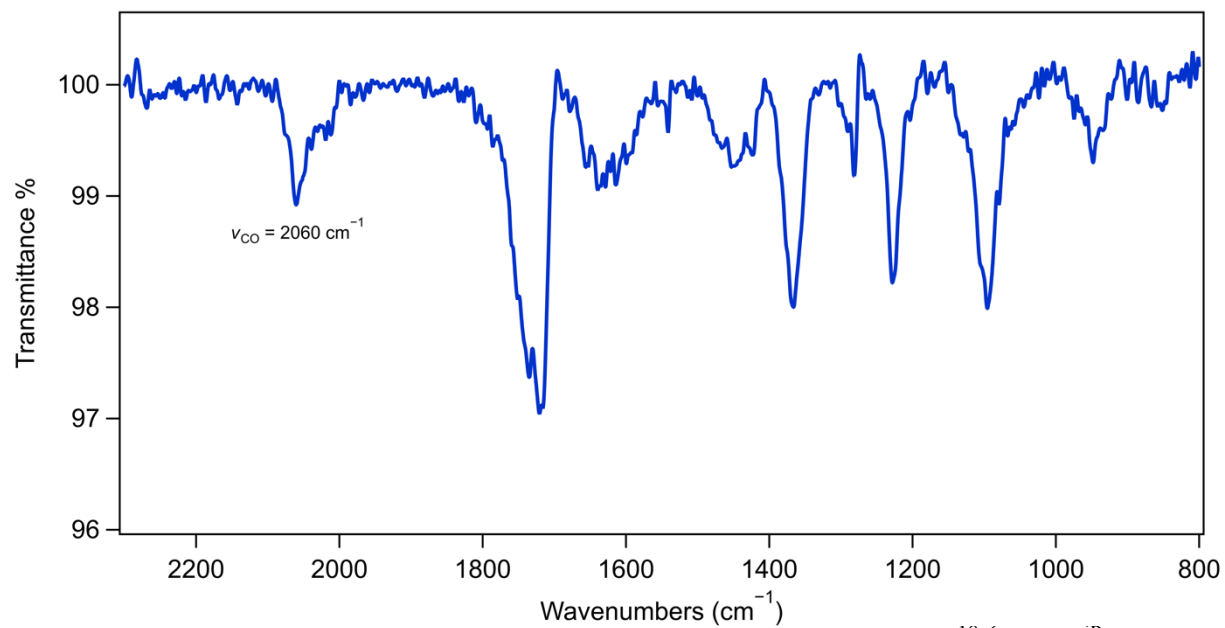

**Figure S32.** Infrared spectrum after carbonylation reaction using 2.5 mM (<sup>18</sup>c<sup>6</sup>NCOP<sup>i</sup>Pr)Ir(CO) and 0.74 mM MeI pressurized with 25 bar CO and heated to 150 °C for 6 h.

B. Representative spectra of NMR-scale catalysis at low temperature and low pressure

$(\text{MeO-}^{18}\text{c}_6\text{NCOP}^i\text{Pr})\text{Ir}(\text{CO}) + \text{CH}_3\text{I} + \text{CO}$  in  $\text{CH}_3\text{OH}$

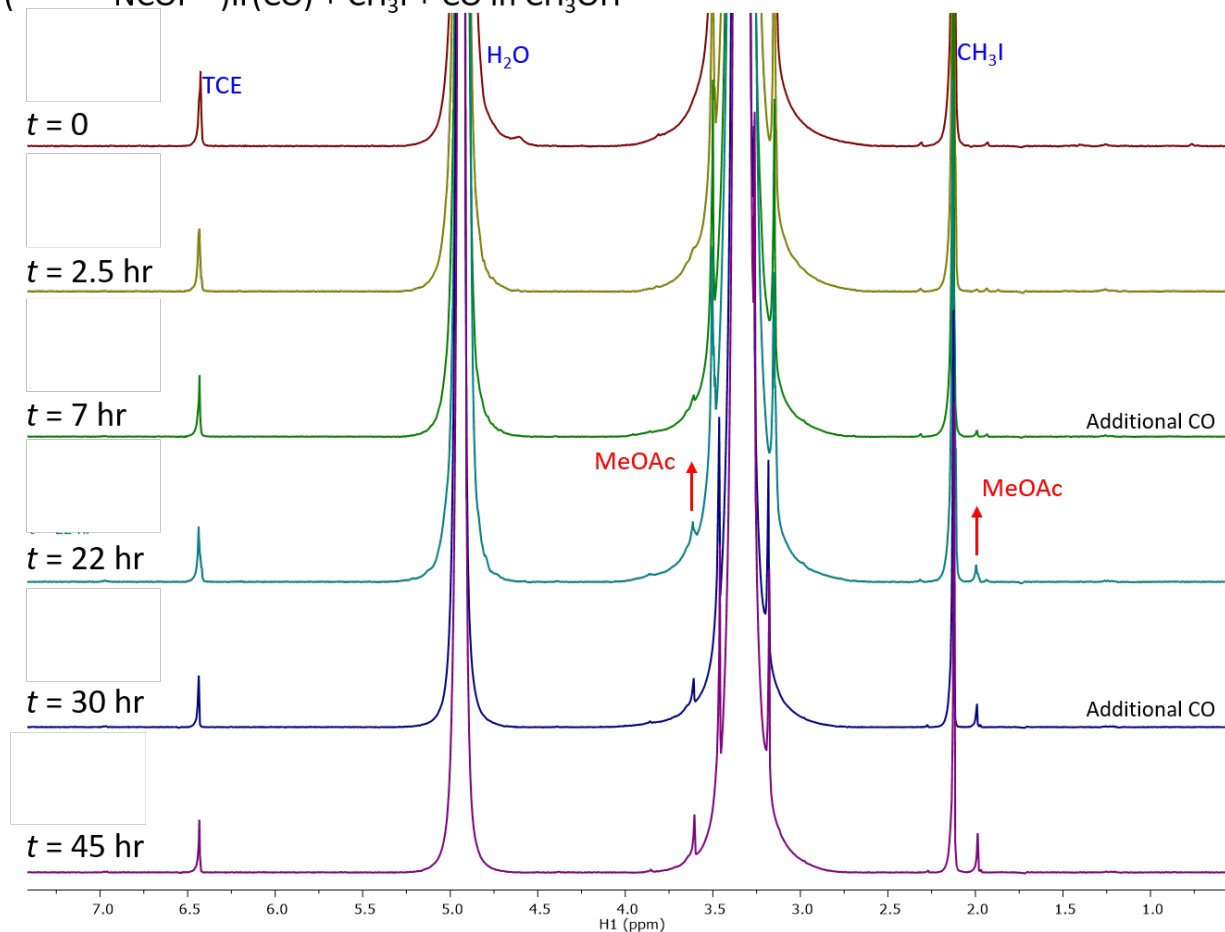

**Figure S33.**  $^1\text{H}$  NMR spectra of *in situ* monitored catalysis by  $(\text{MeO-}^{18}\text{c}_6\text{NCOP}^i\text{Pr})\text{Ir}(\text{CO})$  ( $2^{\text{MeO-}^{18}\text{c}_6}$ ) at low temperature ( $70^\circ\text{C}$ ) and pressure (1 bar CO). 1,1,2,2-tetrachloroethane (TCE) was used as an internal standard and the growth of  $\text{CH}_3\text{OAc}$  can be seen at 2.0 and 3.6 ppm.

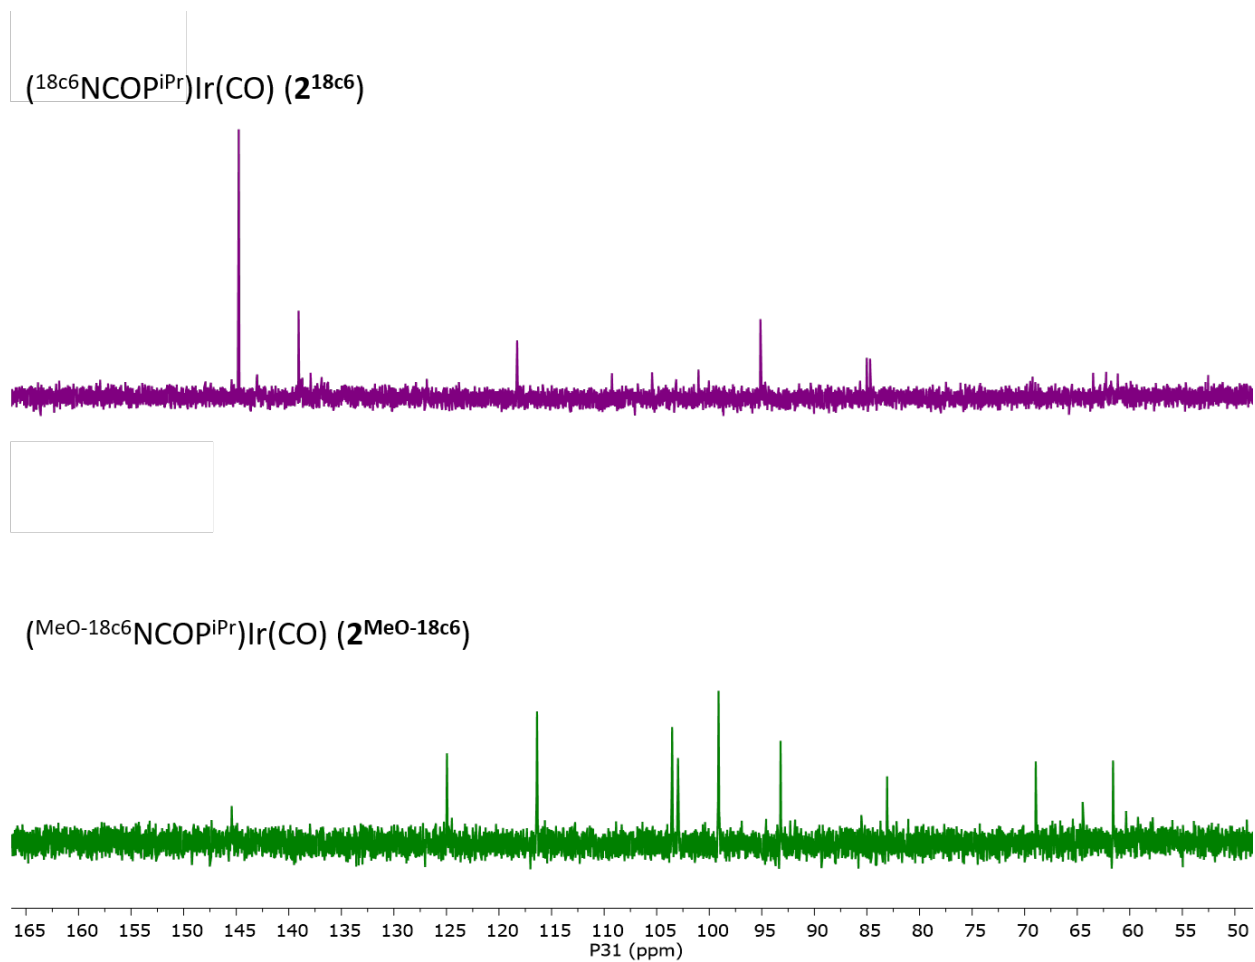

**Figure S34.**  $^{31}\text{P}\{^1\text{H}\}$  NMR spectra of final products after 40 h of catalysis at low temperature (70 °C) and pressure (1 bar CO) for both iridium pincer catalysts.

C. Stoichiometric reactivity monitored by NMR spectroscopy

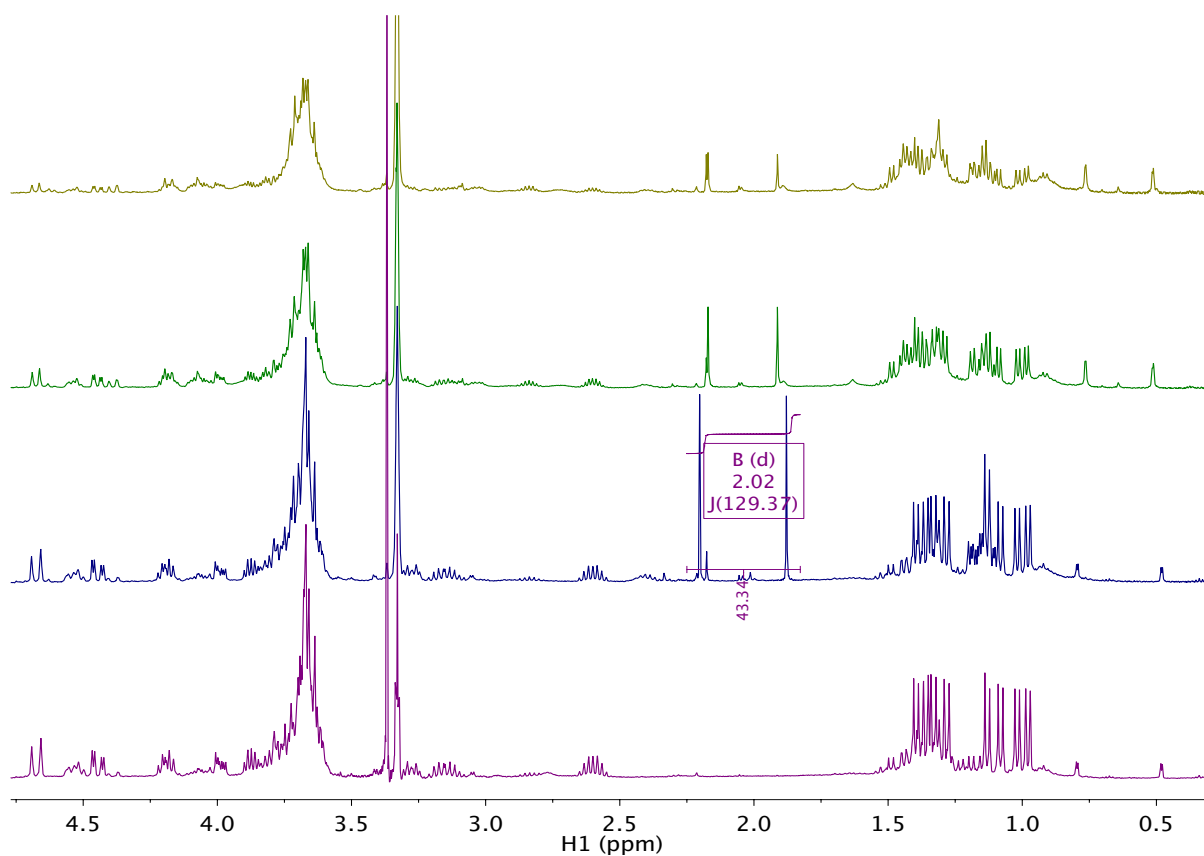

**Figure S35.** <sup>1</sup>H NMR spectra of (<sup>15</sup>c<sup>5</sup>NCOP<sup>i</sup>Pr)Ir(<sup>13</sup>CH<sub>3</sub>)(CO)(I) under 1 atm CO in CD<sub>3</sub>OH utilizing a CD<sub>3</sub>OD capillary tube at 2 h (top), 4 h (upper middle), and 40 h (lower middle). The presence of free methyl acetate was confirmed by evaporation of the reaction solvent and re-dissolving in fresh CD<sub>3</sub>OD (bottom), which removes the volatile product.

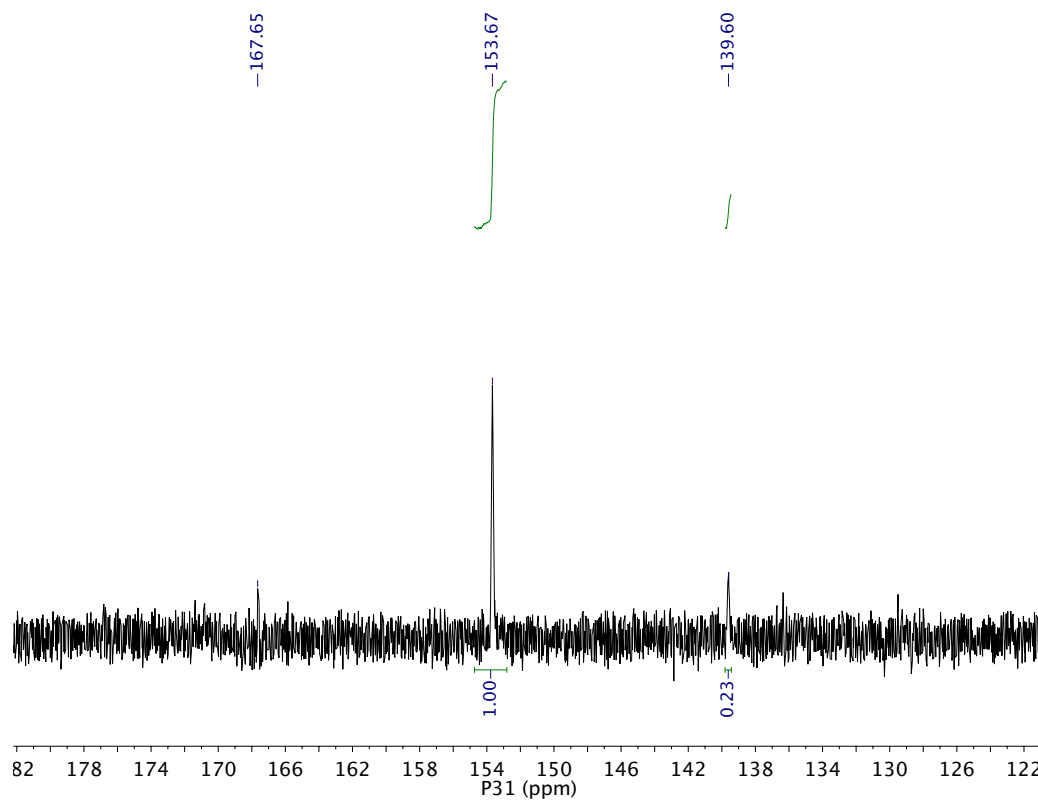

**Figure S36.**  $^{31}\text{P}\{^1\text{H}\}$  NMR spectrum of  $(^{15}\text{c}5)\text{NCOP}^{i\text{Pr}}\text{Ir}(^{13}\text{CH}_3)(\text{CO})(\text{I})$  under 1 atm CO in  $\text{CD}_3\text{OD}$  after 40 h.

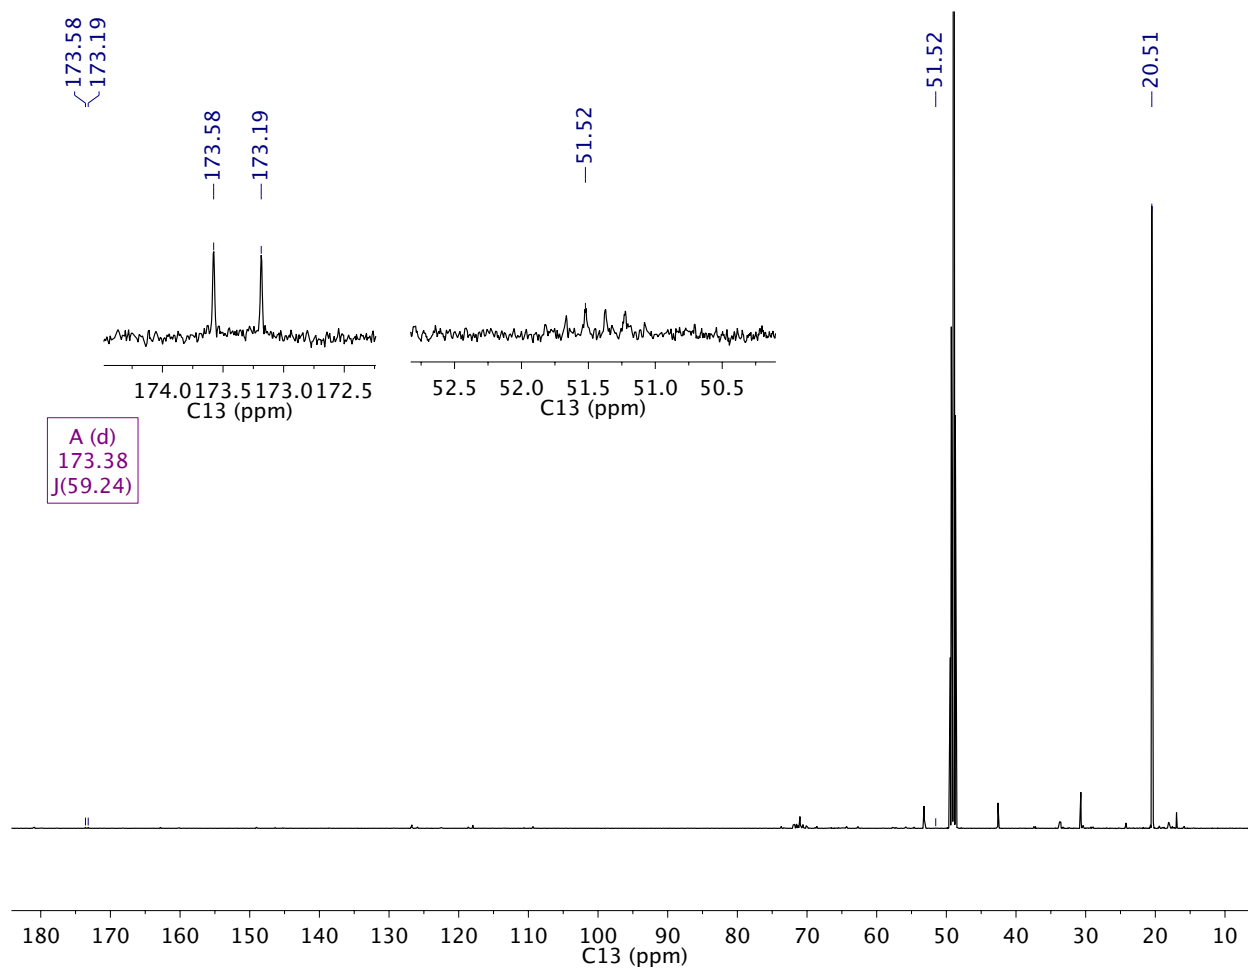

**Figure S37.**  $^{13}\text{C}\{^1\text{H}\}$  NMR spectrum after the reaction of  $(^{15}\text{c}^5\text{NCOP}^{\text{iPr}})\text{Ir}(^{13}\text{CH}_3)(\text{CO})(\text{I})$  with 1 atm CO in  $\text{CD}_3\text{OD}$ . Highlighted resonances are consistent with  $^{13}\text{CH}_3\text{C}(\text{O})\text{OCD}_3$ .

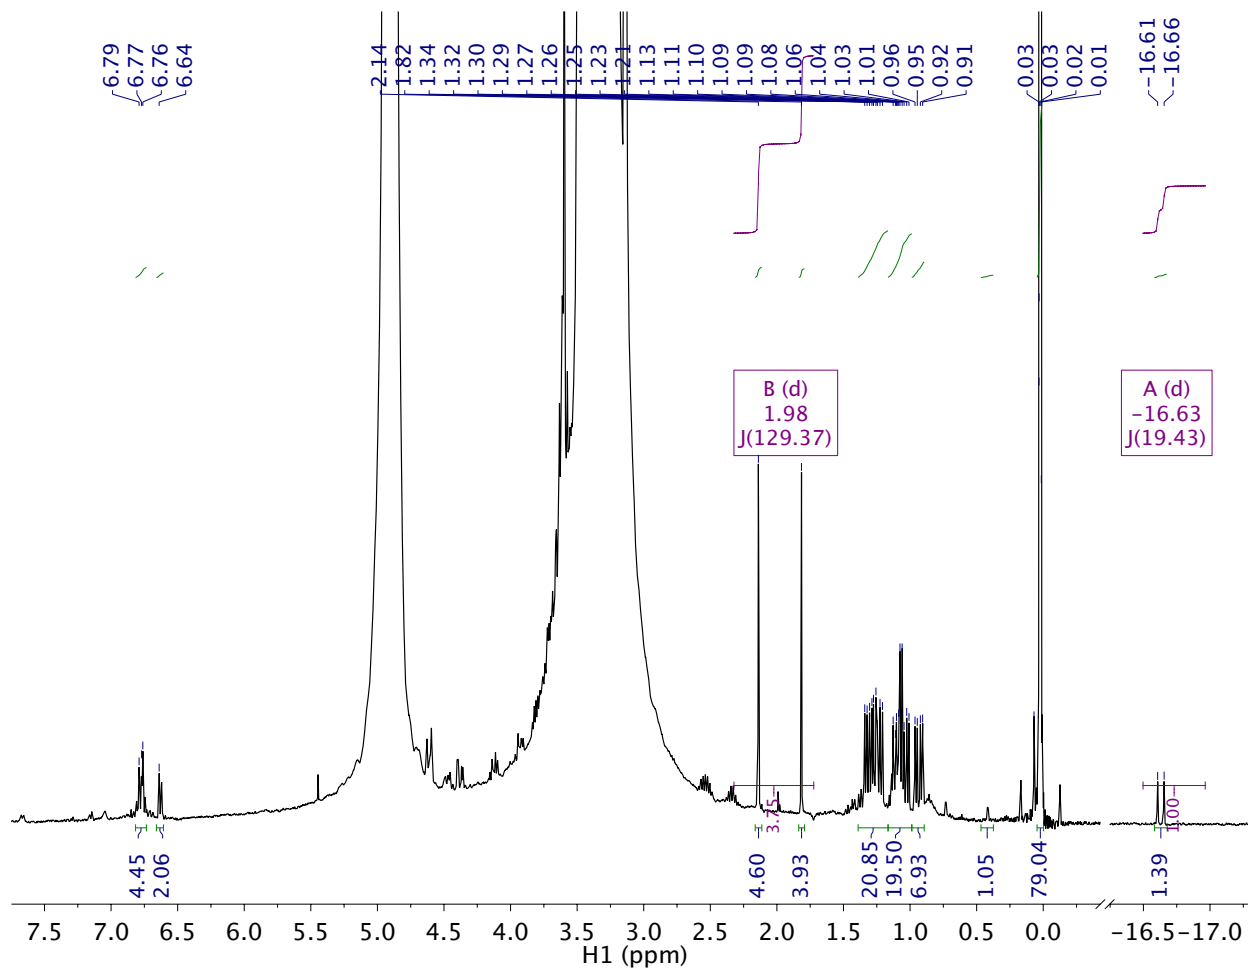

**Figure S38.**  $^1\text{H}$  NMR spectra of  $(^{15}\text{c}5\text{NCOP}^{\text{iPr}})\text{Ir}(^{13}\text{CH}_3)(\text{CO})(\text{I})$  under 1 atm CO in  $\text{CH}_3\text{OH}$  utilizing a  $\text{CD}_3\text{OD}$  capillary tube after 40 h.



#### IV. Crystallographic Details

**Table S7. Crystal data and structure refinement for ( $^{18c6}\text{NCOP}^{\text{iPr}}$ )Ir(H)(CO)(Cl) ( $1^{18c6}$ ).**

|                                               |                                                                |
|-----------------------------------------------|----------------------------------------------------------------|
| Identification code                           | x1510003                                                       |
| Empirical formula                             | $\text{C}_{26}\text{H}_{44}\text{ClIrNO}_7\text{P}$            |
| Formula weight                                | 741.24                                                         |
| Temperature/K                                 | 100.15                                                         |
| Crystal system                                | monoclinic                                                     |
| Space group                                   | $\text{P2}_1/\text{c}$                                         |
| $a/\text{\AA}$                                | 15.0632(4)                                                     |
| $b/\text{\AA}$                                | 12.3425(3)                                                     |
| $c/\text{\AA}$                                | 16.2371(4)                                                     |
| $\alpha/^\circ$                               | 90                                                             |
| $\beta/^\circ$                                | 107.6431(13)                                                   |
| $\gamma/^\circ$                               | 90                                                             |
| Volume/ $\text{\AA}^3$                        | 2876.77(13)                                                    |
| Z                                             | 4                                                              |
| $\rho_{\text{calc}}/\text{g/cm}^3$            | 1.711                                                          |
| $\mu/\text{mm}^{-1}$                          | 10.732                                                         |
| F(000)                                        | 1488.0                                                         |
| Crystal size/ $\text{mm}^3$                   | $0.155 \times 0.061 \times 0.051$                              |
| Radiation                                     | $\text{CuK}\alpha$ ( $\lambda = 1.54178$ )                     |
| $2\theta$ range for data collection/ $^\circ$ | 6.156 to 140.38                                                |
| Index ranges                                  | $-18 \leq h \leq 18, -15 \leq k \leq 15, -19 \leq l \leq 19$   |
| Reflections collected                         | 53983                                                          |
| Independent reflections                       | 51638 [ $R_{\text{int}} = 0.0456, R_{\text{sigma}} = 0.0407$ ] |
| Data/restraints/parameters                    | 51638/0/343                                                    |
| Goodness-of-fit on $F^2$                      | 1.026                                                          |
| Final R indexes [ $I \geq 2\sigma(I)$ ]       | $R_1 = 0.0385, wR_2 = 0.0882$                                  |
| Final R indexes [all data]                    | $R_1 = 0.0495, wR_2 = 0.0936$                                  |
| Largest diff. peak/hole / $e \text{\AA}^{-3}$ | 1.28/-0.70                                                     |

**Table S8. Bond Lengths for ( $^{18c6}\text{NCOP}^{\text{iPr}}$ )Ir(H)(CO)(Cl) ( $1^{18c6}$ ).**

| Atom | Atom | Length/ $\text{\AA}$ | Atom | Atom | Length/ $\text{\AA}$ |
|------|------|----------------------|------|------|----------------------|
| Ir1  | Cl1  | 2.5070(13)           | C15  | C16  | 1.511(8)             |
| Ir1  | P1   | 2.2288(13)           | C16  | N17  | 1.513(7)             |
| Ir1  | C1   | 1.933(6)             | N17  | C18  | 1.509(7)             |
| Ir1  | C10  | 2.030(6)             | N17  | C34  | 1.507(7)             |
| Ir1  | N17  | 2.224(5)             | C18  | C19  | 1.523(8)             |
| P1   | C3   | 1.832(6)             | C19  | O20  | 1.427(7)             |

|     |     |          |     |     |          |
|-----|-----|----------|-----|-----|----------|
| P1  | C6  | 1.826(6) | O20 | C21 | 1.422(7) |
| P1  | O9  | 1.658(4) | C21 | C22 | 1.504(8) |
| C1  | O2  | 1.130(8) | C22 | O23 | 1.424(7) |
| C3  | C4  | 1.531(8) | O23 | C24 | 1.425(7) |
| C3  | C5  | 1.529(8) | C24 | C25 | 1.506(9) |
| C6  | C7  | 1.534(7) | C25 | O26 | 1.424(7) |
| C6  | C8  | 1.529(8) | O26 | C27 | 1.415(8) |
| O9  | C11 | 1.399(7) | C27 | C28 | 1.501(9) |
| C10 | C11 | 1.385(8) | C28 | O29 | 1.427(7) |
| C10 | C15 | 1.393(8) | O29 | C30 | 1.416(7) |
| C11 | C12 | 1.381(9) | C30 | C31 | 1.505(8) |
| C12 | C13 | 1.399(9) | C31 | O32 | 1.415(7) |
| C13 | C14 | 1.393(9) | O32 | C33 | 1.432(7) |
| C14 | C15 | 1.392(9) | C33 | C34 | 1.521(8) |

**Table S9. Bond Angles for ( $^{18}\text{C}6\text{NCOP}^{\text{iPr}}$ )Ir(H)(CO)(Cl) ( $1^{18}\text{C}6$ ).**

| Atom | Atom | Atom | Angle/°    | Atom | Atom | Atom | Angle/°  |
|------|------|------|------------|------|------|------|----------|
| P1   | Ir1  | Cl1  | 97.86(5)   | C11  | C12  | C13  | 117.3(6) |
| C1   | Ir1  | Cl1  | 94.53(17)  | C14  | C13  | C12  | 121.6(6) |
| C1   | Ir1  | P1   | 98.56(17)  | C15  | C14  | C13  | 119.5(6) |
| C1   | Ir1  | C10  | 176.0(2)   | C10  | C15  | C16  | 114.1(5) |
| C1   | Ir1  | N17  | 102.4(2)   | C14  | C15  | C10  | 119.6(6) |
| C10  | Ir1  | Cl1  | 89.25(16)  | C14  | C15  | C16  | 126.1(6) |
| C10  | Ir1  | P1   | 79.51(16)  | C15  | C16  | N17  | 110.3(5) |
| C10  | Ir1  | N17  | 79.1(2)    | C16  | N17  | Ir1  | 105.9(3) |
| N17  | Ir1  | Cl1  | 88.13(12)  | C18  | N17  | Ir1  | 112.0(3) |
| N17  | Ir1  | P1   | 157.68(14) | C18  | N17  | C16  | 106.1(5) |
| C3   | P1   | Ir1  | 119.14(19) | C34  | N17  | Ir1  | 110.7(4) |
| C6   | P1   | Ir1  | 118.73(19) | C34  | N17  | C16  | 109.4(4) |
| C6   | P1   | C3   | 107.8(3)   | C34  | N17  | C18  | 112.4(4) |
| O9   | P1   | Ir1  | 106.69(15) | N17  | C18  | C19  | 116.0(5) |
| O9   | P1   | C3   | 99.3(2)    | O20  | C19  | C18  | 109.8(5) |
| O9   | P1   | C6   | 101.8(2)   | C21  | O20  | C19  | 112.5(5) |
| O2   | C1   | Ir1  | 175.1(5)   | O20  | C21  | C22  | 115.1(5) |
| C4   | C3   | P1   | 110.0(4)   | O23  | C22  | C21  | 109.0(5) |
| C5   | C3   | P1   | 113.1(4)   | C22  | O23  | C24  | 112.7(5) |
| C5   | C3   | C4   | 111.6(5)   | O23  | C24  | C25  | 113.2(5) |
| C7   | C6   | P1   | 113.3(4)   | O26  | C25  | C24  | 111.4(5) |
| C8   | C6   | P1   | 111.2(4)   | C27  | O26  | C25  | 110.0(5) |
| C8   | C6   | C7   | 112.7(5)   | O26  | C27  | C28  | 110.9(5) |
| C11  | O9   | P1   | 114.4(3)   | O29  | C28  | C27  | 110.4(5) |

|     |     |     |          |     |     |     |          |
|-----|-----|-----|----------|-----|-----|-----|----------|
| C11 | C10 | Ir1 | 122.1(4) | C30 | O29 | C28 | 110.8(5) |
| C11 | C10 | C15 | 119.5(5) | O29 | C30 | C31 | 110.7(5) |
| C15 | C10 | Ir1 | 118.4(4) | O32 | C31 | C30 | 109.8(5) |
| C10 | C11 | O9  | 117.0(5) | C31 | O32 | C33 | 111.8(4) |
| C12 | C11 | O9  | 120.6(5) | O32 | C33 | C34 | 108.6(5) |
| C12 | C11 | C10 | 122.3(6) | N17 | C34 | C33 | 116.7(5) |

**Table S10. Torsion Angles for ( $^{18}\text{C}6\text{NCOP}^{\text{iPr}}$ )Ir(H)(CO)(Cl) ( $1^{18}\text{C}6$ ).**

| A   | B   | C   | D   | Angle/°   | A   | B   | C   | D   | Angle/°   |
|-----|-----|-----|-----|-----------|-----|-----|-----|-----|-----------|
| Ir1 | P1  | C3  | C4  | -51.7(5)  | C12 | C13 | C14 | C15 | 1.3(9)    |
| Ir1 | P1  | C3  | C5  | 73.8(5)   | C13 | C14 | C15 | C10 | 2.3(9)    |
| Ir1 | P1  | C6  | C7  | -179.5(4) | C13 | C14 | C15 | C16 | -173.2(5) |
| Ir1 | P1  | C6  | C8  | -51.3(5)  | C14 | C15 | C16 | N17 | -152.4(5) |
| Ir1 | P1  | O9  | C11 | -4.2(4)   | C15 | C10 | C11 | O9  | -177.9(5) |
| Ir1 | C10 | C11 | O9  | 2.9(7)    | C15 | C10 | C11 | C12 | 2.6(9)    |
| Ir1 | C10 | C11 | C12 | -176.6(4) | C15 | C16 | N17 | Ir1 | -36.9(5)  |
| Ir1 | C10 | C15 | C14 | 175.0(4)  | C15 | C16 | N17 | C18 | 82.2(5)   |
| Ir1 | C10 | C15 | C16 | -9.0(7)   | C15 | C16 | N17 | C34 | -156.3(5) |
| Ir1 | N17 | C18 | C19 | -63.2(5)  | C16 | N17 | C18 | C19 | -178.3(4) |
| Ir1 | N17 | C34 | C33 | 178.1(4)  | C16 | N17 | C34 | C33 | -65.5(6)  |
| P1  | O9  | C11 | C10 | 1.3(6)    | N17 | C18 | C19 | O20 | 104.5(6)  |
| P1  | O9  | C11 | C12 | -179.2(4) | C18 | N17 | C34 | C33 | 52.1(6)   |
| C3  | P1  | C6  | C7  | -40.1(5)  | C18 | C19 | O20 | C21 | -161.1(5) |
| C3  | P1  | C6  | C8  | 88.2(4)   | C19 | O20 | C21 | C22 | -73.4(6)  |
| C3  | P1  | O9  | C11 | -128.5(4) | O20 | C21 | C22 | O23 | -73.6(6)  |
| C6  | P1  | C3  | C4  | 169.0(4)  | C21 | C22 | O23 | C24 | 169.8(5)  |
| C6  | P1  | C3  | C5  | -65.5(5)  | C22 | O23 | C24 | C25 | -88.4(6)  |
| C6  | P1  | O9  | C11 | 120.9(4)  | O23 | C24 | C25 | O26 | 70.3(7)   |
| O9  | P1  | C3  | C4  | 63.4(4)   | C24 | C25 | O26 | C27 | -176.1(5) |
| O9  | P1  | C3  | C5  | -171.1(4) | C25 | O26 | C27 | C28 | -175.2(5) |
| O9  | P1  | C6  | C7  | 63.8(5)   | O26 | C27 | C28 | O29 | -74.0(7)  |
| O9  | P1  | C6  | C8  | -167.9(4) | C27 | C28 | O29 | C30 | 174.3(5)  |
| O9  | C11 | C12 | C13 | -178.5(5) | C28 | O29 | C30 | C31 | 168.1(5)  |
| C10 | C11 | C12 | C13 | 0.9(9)    | O29 | C30 | C31 | O32 | 63.9(7)   |
| C10 | C15 | C16 | N17 | 32.0(7)   | C30 | C31 | O32 | C33 | 178.7(5)  |
| C11 | C10 | C15 | C14 | -4.2(8)   | C31 | O32 | C33 | C34 | 167.4(5)  |
| C11 | C10 | C15 | C16 | 171.8(5)  | O32 | C33 | C34 | N17 | -80.9(6)  |
| C11 | C12 | C13 | C14 | -2.9(9)   | C34 | N17 | C18 | C19 | 62.2(6)   |

**Table S11. Crystal data and structure refinement for (<sup>18c6</sup>NCOP<sup>iPr</sup>)Ir(CO) (2<sup>18c6</sup>).**

|                                             |                                                                |
|---------------------------------------------|----------------------------------------------------------------|
| Identification code                         | x1509008                                                       |
| Empirical formula                           | C <sub>26</sub> H <sub>43</sub> IrNO <sub>7</sub> P            |
| Formula weight                              | 704.78                                                         |
| Temperature/K                               | 100                                                            |
| Crystal system                              | triclinic                                                      |
| Space group                                 | P-1                                                            |
| a/Å                                         | 7.7588(6)                                                      |
| b/Å                                         | 15.5942(12)                                                    |
| c/Å                                         | 24.1160(19)                                                    |
| α/°                                         | 89.185(4)                                                      |
| β/°                                         | 82.743(4)                                                      |
| γ/°                                         | 89.582(5)                                                      |
| Volume/Å <sup>3</sup>                       | 2894.1(4)                                                      |
| Z                                           | 4                                                              |
| ρ <sub>calc</sub> /cm <sup>3</sup>          | 1.618                                                          |
| μ/mm <sup>-1</sup>                          | 9.806                                                          |
| F(000)                                      | 1416.0                                                         |
| Crystal size/mm <sup>3</sup>                | 0.199 × 0.195 × 0.094                                          |
| Radiation                                   | CuKα (λ = 1.54178)                                             |
| 2θ range for data collection/°              | 3.694 to 144.548                                               |
| Index ranges                                | -9 ≤ h ≤ 9, -19 ≤ k ≤ 19, -29 ≤ l ≤ 29                         |
| Reflections collected                       | 114739                                                         |
| Independent reflections                     | 11097 [R <sub>int</sub> = 0.0466, R <sub>sigma</sub> = 0.0269] |
| Data/restraints/parameters                  | 11097/0/657                                                    |
| Goodness-of-fit on F <sup>2</sup>           | 1.068                                                          |
| Final R indexes [I >= 2σ (I)]               | R <sub>1</sub> = 0.0246, wR <sub>2</sub> = 0.0511              |
| Final R indexes [all data]                  | R <sub>1</sub> = 0.0299, wR <sub>2</sub> = 0.0526              |
| Largest diff. peak/hole / e Å <sup>-3</sup> | 0.51/-0.76                                                     |

**Table S12. Bond Angles for (<sup>18c6</sup>NCOP<sup>iPr</sup>)Ir(CO) (2<sup>18c6</sup>).**

| Atom | Atom | Atom | Angle/°    | Atom | Atom | Atom | Angle/°    |
|------|------|------|------------|------|------|------|------------|
| C9   | Ir1  | P2   | 100.73(10) | C43  | Ir2  | P3   | 100.27(9)  |
| C9   | Ir1  | C17  | 178.77(12) | C43  | Ir2  | C51  | 177.99(12) |
| C9   | Ir1  | N19  | 100.69(11) | C43  | Ir2  | N53  | 102.64(11) |
| C17  | Ir1  | P2   | 79.78(9)   | C51  | Ir2  | P3   | 79.08(9)   |

|     |     |     |            |     |     |     |            |
|-----|-----|-----|------------|-----|-----|-----|------------|
| C17 | Ir1 | N19 | 78.62(11)  | C51 | Ir2 | N53 | 78.21(11)  |
| N19 | Ir1 | P2  | 156.44(6)  | N53 | Ir2 | P3  | 156.37(6)  |
| C3  | P2  | Ir1 | 116.74(11) | C37 | P3  | Ir2 | 118.57(11) |
| C3  | P2  | C6  | 106.17(14) | C37 | P3  | C40 | 105.73(14) |
| C6  | P2  | Ir1 | 123.40(10) | C40 | P3  | Ir2 | 121.98(10) |
| O11 | P2  | Ir1 | 107.43(8)  | O45 | P3  | Ir2 | 107.30(8)  |
| O11 | P2  | C3  | 99.88(13)  | O45 | P3  | C37 | 99.99(13)  |
| O11 | P2  | C6  | 99.17(12)  | O45 | P3  | C40 | 99.25(12)  |
| C4  | C3  | P2  | 109.3(2)   | C38 | C37 | P3  | 111.1(2)   |
| C5  | C3  | P2  | 110.6(2)   | C38 | C37 | C39 | 111.4(3)   |
| C5  | C3  | C4  | 111.5(3)   | C39 | C37 | P3  | 109.4(2)   |
| C7  | C6  | P2  | 108.4(2)   | C41 | C40 | P3  | 112.8(2)   |
| C7  | C6  | C8  | 111.4(3)   | C42 | C40 | P3  | 107.9(2)   |
| C8  | C6  | P2  | 113.5(2)   | C42 | C40 | C41 | 111.5(3)   |
| O10 | C9  | Ir1 | 178.5(3)   | O44 | C43 | Ir2 | 178.6(3)   |
| C12 | O11 | P2  | 113.63(18) | C46 | O45 | P3  | 113.13(18) |
| C13 | C12 | O11 | 120.7(3)   | C47 | C46 | O45 | 121.4(3)   |
| C13 | C12 | C17 | 122.2(3)   | C47 | C46 | C51 | 122.2(3)   |
| C17 | C12 | O11 | 117.1(3)   | C51 | C46 | O45 | 116.4(3)   |
| C12 | C13 | C14 | 117.3(3)   | C46 | C47 | C48 | 117.4(3)   |
| C15 | C14 | C13 | 122.1(3)   | C49 | C48 | C47 | 122.2(3)   |
| C14 | C15 | C16 | 119.2(3)   | C48 | C49 | C50 | 118.8(3)   |
| C15 | C16 | C18 | 125.1(3)   | C49 | C50 | C51 | 120.2(3)   |
| C17 | C16 | C15 | 119.9(3)   | C49 | C50 | C52 | 125.4(3)   |
| C17 | C16 | C18 | 115.0(3)   | C51 | C50 | C52 | 114.5(3)   |
| C12 | C17 | Ir1 | 121.7(2)   | C46 | C51 | Ir2 | 122.3(2)   |
| C16 | C17 | Ir1 | 118.9(2)   | C46 | C51 | C50 | 119.2(3)   |
| C16 | C17 | C12 | 119.3(3)   | C50 | C51 | Ir2 | 118.4(2)   |
| C16 | C18 | N19 | 109.7(2)   | C50 | C52 | N53 | 109.3(2)   |
| C18 | N19 | Ir1 | 108.27(17) | C52 | N53 | Ir2 | 107.59(16) |
| C20 | N19 | Ir1 | 116.05(17) | C54 | N53 | Ir2 | 115.24(17) |
| C20 | N19 | C18 | 110.7(2)   | C54 | N53 | C52 | 110.4(2)   |
| C20 | N19 | C36 | 109.5(2)   | C54 | N53 | C70 | 109.3(2)   |
| C36 | N19 | Ir1 | 102.00(17) | C70 | N53 | Ir2 | 108.80(17) |
| C36 | N19 | C18 | 109.9(2)   | C70 | N53 | C52 | 105.0(2)   |
| N19 | C20 | C21 | 115.2(2)   | N53 | C54 | C55 | 114.6(2)   |
| O22 | C21 | C20 | 109.8(2)   | O56 | C55 | C54 | 110.1(2)   |
| C21 | O22 | C23 | 113.1(2)   | C55 | O56 | C57 | 112.8(2)   |
| O22 | C23 | C24 | 112.3(3)   | O56 | C57 | C58 | 112.3(3)   |
| O25 | C24 | C23 | 108.7(3)   | O59 | C58 | C57 | 108.6(3)   |
| C24 | O25 | C26 | 112.4(2)   | C60 | O59 | C58 | 112.0(3)   |
| O25 | C26 | C27 | 107.6(3)   | O59 | C60 | C61 | 108.4(3)   |

|     |     |     |          |     |     |     |          |
|-----|-----|-----|----------|-----|-----|-----|----------|
| O28 | C27 | C26 | 109.1(3) | O62 | C61 | C60 | 109.0(3) |
| C29 | O28 | C27 | 113.0(3) | C61 | O62 | C63 | 111.5(3) |
| O28 | C29 | C30 | 109.0(3) | O62 | C63 | C64 | 109.3(3) |
| O31 | C30 | C29 | 110.5(3) | O65 | C64 | C63 | 110.0(3) |
| C30 | O31 | C32 | 110.9(3) | C64 | O65 | C66 | 111.8(3) |
| O31 | C32 | C33 | 109.4(3) | O65 | C66 | C67 | 108.9(3) |
| O34 | C33 | C32 | 108.4(3) | O68 | C67 | C66 | 107.6(3) |
| C33 | O34 | C35 | 113.3(2) | C67 | O68 | C69 | 113.6(2) |
| O34 | C35 | C36 | 115.5(2) | O68 | C69 | C70 | 108.6(2) |
| N19 | C36 | C35 | 118.2(3) | N53 | C70 | C69 | 116.2(2) |

**Table S13. Torsion Angles for ( $^{18}\text{C}6$ NCOP $^{\text{iPr}}$ )Ir(CO) ( $2^{18}\text{C}6$ ).**

| A   | B   | C   | D   | Angle/°    | A   | B   | C   | D   | Angle/°     |
|-----|-----|-----|-----|------------|-----|-----|-----|-----|-------------|
| Ir1 | P2  | C3  | C4  | -47.3(2)   | Ir2 | P3  | C37 | C38 | -75.9(2)    |
| Ir1 | P2  | C3  | C5  | 75.9(2)    | Ir2 | P3  | C37 | C39 | 47.5(2)     |
| Ir1 | P2  | C6  | C7  | 54.1(2)    | Ir2 | P3  | C40 | C41 | -172.92(17) |
| Ir1 | P2  | C6  | C8  | 178.46(18) | Ir2 | P3  | C40 | C42 | -49.3(2)    |
| Ir1 | P2  | O11 | C12 | -5.9(2)    | Ir2 | P3  | O45 | C46 | 13.8(2)     |
| Ir1 | N19 | C20 | C21 | -55.0(3)   | Ir2 | N53 | C54 | C55 | 57.8(3)     |
| Ir1 | N19 | C36 | C35 | 175.3(2)   | Ir2 | N53 | C70 | C69 | 67.6(3)     |
| P2  | O11 | C12 | C13 | -176.7(2)  | P3  | O45 | C46 | C47 | 170.7(2)    |
| P2  | O11 | C12 | C17 | 3.4(3)     | P3  | O45 | C46 | C51 | -8.8(3)     |
| C3  | P2  | C6  | C7  | -167.1(2)  | C37 | P3  | C40 | C41 | 47.5(3)     |
| C3  | P2  | C6  | C8  | -42.7(3)   | C37 | P3  | C40 | C42 | 171.0(2)    |
| C3  | P2  | O11 | C12 | -128.1(2)  | C37 | P3  | O45 | C46 | 138.1(2)    |
| C6  | P2  | C3  | C4  | 170.7(2)   | C40 | P3  | C37 | C38 | 65.3(2)     |
| C6  | P2  | C3  | C5  | -66.1(2)   | C40 | P3  | C37 | C39 | -171.3(2)   |
| C6  | P2  | O11 | C12 | 123.6(2)   | C40 | P3  | O45 | C46 | -114.0(2)   |
| O11 | P2  | C3  | C4  | 68.1(2)    | O45 | P3  | C37 | C38 | 168.0(2)    |
| O11 | P2  | C3  | C5  | -168.8(2)  | O45 | P3  | C37 | C39 | -68.6(2)    |
| O11 | P2  | C6  | C7  | -63.9(2)   | O45 | P3  | C40 | C41 | -55.7(2)    |
| O11 | P2  | C6  | C8  | 60.4(2)    | O45 | P3  | C40 | C42 | 67.8(2)     |
| O11 | C12 | C13 | C14 | 179.9(3)   | O45 | C46 | C47 | C48 | -179.7(3)   |
| O11 | C12 | C17 | Ir1 | 1.2(4)     | O45 | C46 | C51 | Ir2 | -1.5(4)     |
| O11 | C12 | C17 | C16 | 179.6(3)   | O45 | C46 | C51 | C50 | 178.6(3)    |
| C12 | C13 | C14 | C15 | 0.7(5)     | C46 | C47 | C48 | C49 | 0.6(5)      |
| C13 | C12 | C17 | Ir1 | -178.7(2)  | C47 | C46 | C51 | Ir2 | 179.0(2)    |
| C13 | C12 | C17 | C16 | -0.3(5)    | C47 | C46 | C51 | C50 | -0.9(5)     |
| C13 | C14 | C15 | C16 | -0.7(5)    | C47 | C48 | C49 | C50 | 0.0(5)      |
| C14 | C15 | C16 | C17 | 0.2(5)     | C48 | C49 | C50 | C51 | -1.1(4)     |

|     |     |     |     |           |     |     |     |     |           |
|-----|-----|-----|-----|-----------|-----|-----|-----|-----|-----------|
| C14 | C15 | C16 | C18 | -176.4(3) | C48 | C49 | C50 | C52 | 177.5(3)  |
| C15 | C16 | C17 | Ir1 | 178.7(2)  | C49 | C50 | C51 | Ir2 | -178.3(2) |
| C15 | C16 | C17 | C12 | 0.3(4)    | C49 | C50 | C51 | C46 | 1.5(4)    |
| C15 | C16 | C18 | N19 | -157.6(3) | C49 | C50 | C52 | N53 | 153.9(3)  |
| C16 | C18 | N19 | Ir1 | -32.8(3)  | C50 | C52 | N53 | Ir2 | 36.7(2)   |
| C16 | C18 | N19 | C20 | -161.1(2) | C50 | C52 | N53 | C54 | 163.3(2)  |
| C16 | C18 | N19 | C36 | 77.8(3)   | C50 | C52 | N53 | C70 | -79.0(3)  |
| C17 | C12 | C13 | C14 | -0.2(5)   | C51 | C46 | C47 | C48 | -0.2(5)   |
| C17 | C16 | C18 | N19 | 25.6(3)   | C51 | C50 | C52 | N53 | -27.4(3)  |
| C18 | C16 | C17 | Ir1 | -4.4(4)   | C52 | C50 | C51 | Ir2 | 2.9(3)    |
| C18 | C16 | C17 | C12 | 177.2(3)  | C52 | C50 | C51 | C46 | -177.2(3) |
| C18 | N19 | C20 | C21 | 68.9(3)   | C52 | N53 | C54 | C55 | -64.3(3)  |
| C18 | N19 | C36 | C35 | 60.6(3)   | C52 | N53 | C70 | C69 | -177.5(2) |
| N19 | C20 | C21 | O22 | -87.3(3)  | N53 | C54 | C55 | O56 | 91.4(3)   |
| C20 | N19 | C36 | C35 | -61.2(3)  | C54 | N53 | C70 | C69 | -59.0(3)  |
| C20 | C21 | O22 | C23 | -164.3(2) | C54 | C55 | O56 | C57 | 163.2(2)  |
| C21 | O22 | C23 | C24 | 93.2(3)   | C55 | O56 | C57 | C58 | -91.4(3)  |
| O22 | C23 | C24 | O25 | -66.1(3)  | O56 | C57 | C58 | O59 | 66.3(3)   |
| C23 | C24 | O25 | C26 | 177.3(2)  | C57 | C58 | O59 | C60 | -176.4(2) |
| C24 | O25 | C26 | C27 | -165.0(3) | C58 | O59 | C60 | C61 | 169.5(3)  |
| O25 | C26 | C27 | O28 | 71.6(3)   | O59 | C60 | C61 | O62 | -71.9(4)  |
| C26 | C27 | O28 | C29 | -177.4(3) | C60 | C61 | O62 | C63 | -175.1(3) |
| C27 | O28 | C29 | C30 | -176.5(3) | C61 | O62 | C63 | C64 | 179.7(3)  |
| O28 | C29 | C30 | O31 | -71.0(4)  | O62 | C63 | C64 | O65 | 77.8(4)   |
| C29 | C30 | O31 | C32 | 177.4(3)  | C63 | C64 | O65 | C66 | 179.5(3)  |
| C30 | O31 | C32 | C33 | 179.8(3)  | C64 | O65 | C66 | C67 | 175.9(3)  |
| O31 | C32 | C33 | O34 | 78.4(4)   | O65 | C66 | C67 | O68 | -75.3(3)  |
| C32 | C33 | O34 | C35 | 179.6(3)  | C66 | C67 | O68 | C69 | 173.7(3)  |
| C33 | O34 | C35 | C36 | 77.8(3)   | C67 | O68 | C69 | C70 | -177.3(2) |
| O34 | C35 | C36 | N19 | 67.6(4)   | O68 | C69 | C70 | N53 | 83.8(3)   |
| C36 | N19 | C20 | C21 | -169.8(2) | C70 | N53 | C54 | C55 | -179.3(2) |
